# Supplementary material for: Putative Iron Acquisition Systems in Stenotrophomonas maltophilia
Source: MDPI journal article supplement (doi:10.3390/molecules23082048), 2018-08-16
Supplement: s1 [file s1]

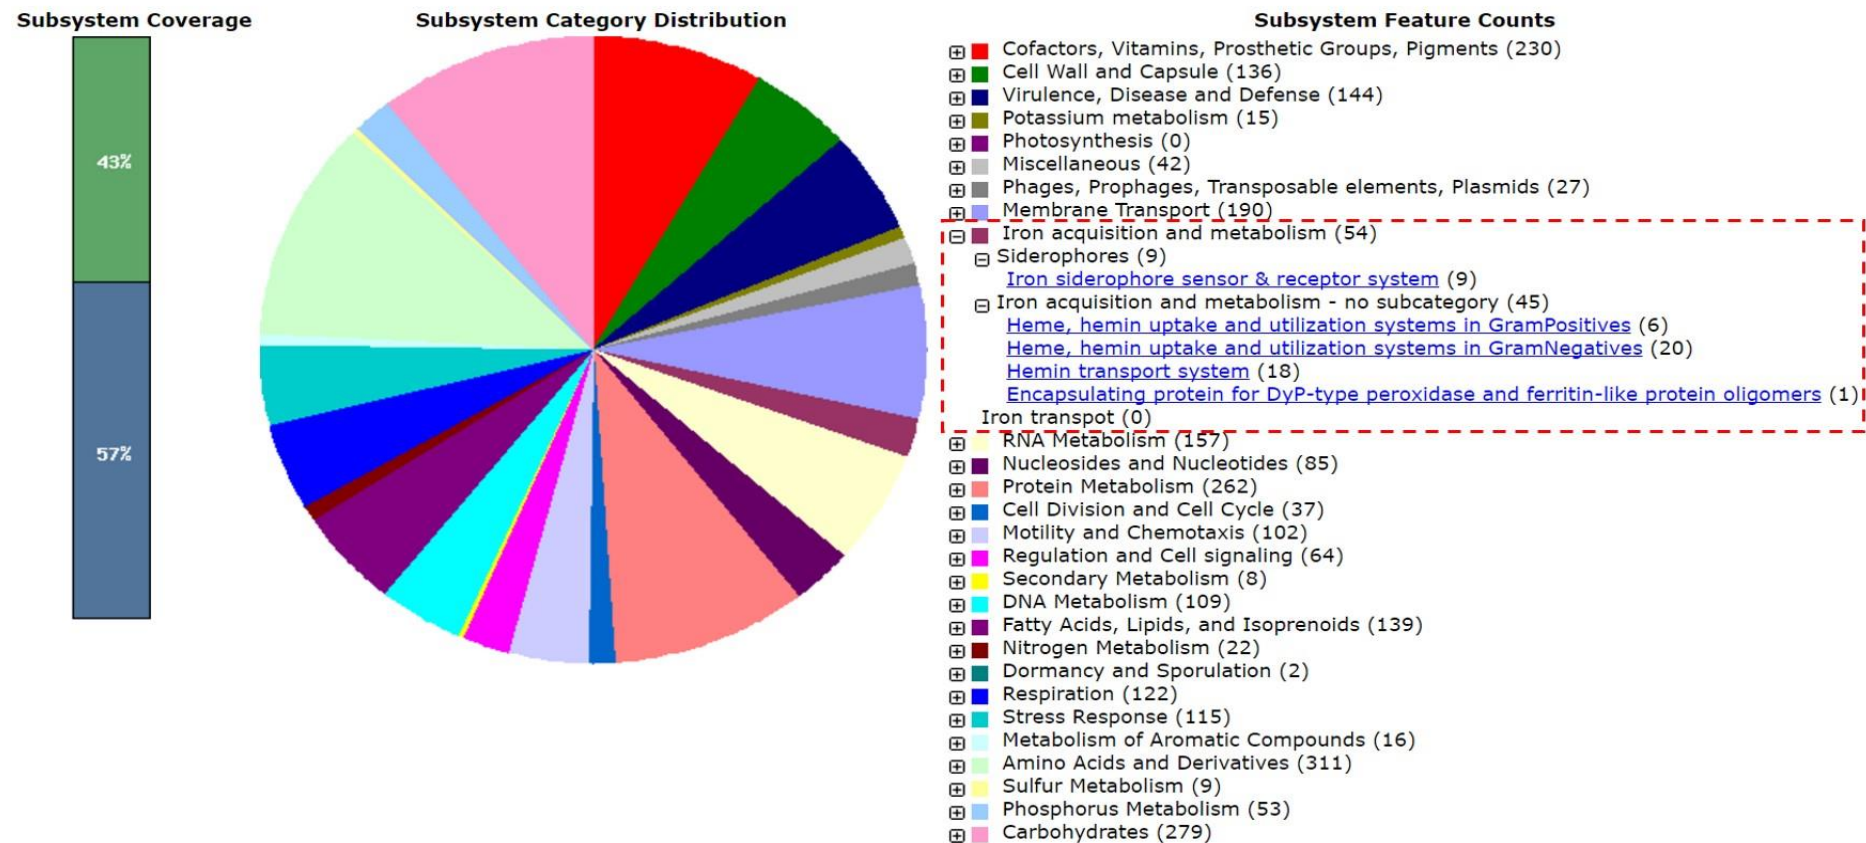

**Figure S1: RAST subsystem information (subsystem statistics) for *S. maltophilia* K279a.** The subsystem features count for the iron acquisition and metabolism were 54/2730 (**marked red in box**), subcategorized under siderophore (9), iron acquisition and metabolism – no subcategory (45) and iron transport (0). The functional roles were “iron siderophore sensor & receptor system (9)”; “heme, heme uptake and utilization systems in Gram-Positives (6)”; “heme, heme uptake and utilization systems in Gram-Negatives (20)”; “heme transport system (18)” and “encapsulating protein for DyP-type peroxidase and ferritin-like protein oligomers (1)”.

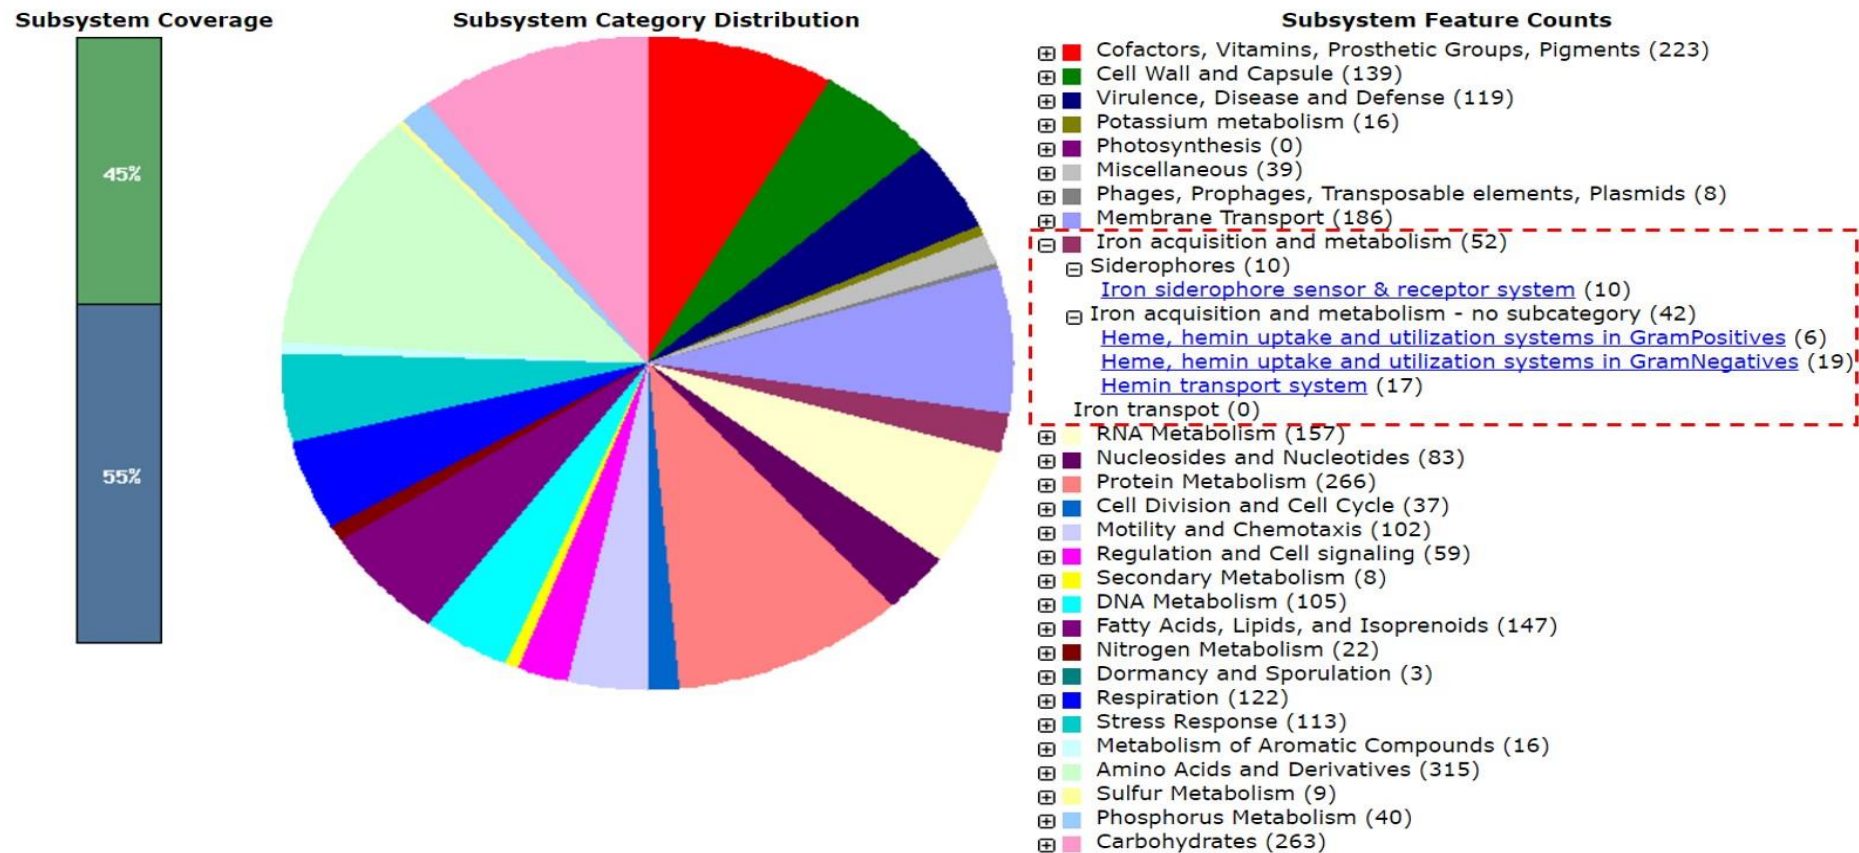

**Figure S2: RAST subsystem information (subsystem statistics) for *S. maltophilia* R551-3.** The subsystem features count for the iron acquisition and metabolism were 52/2649 (**marked red in box**), subcategorized under siderophore (10), iron acquisition and metabolism – no subcategory (42) and iron transport (0). The functional roles were “iron siderophore sensor & receptor system (10)”; “heme, hemin uptake and utilization systems in Gram-Positives (6)”; “heme, hemin uptake and utilization systems in Gram-Negatives (19)” and “hemin transport system (17)”.

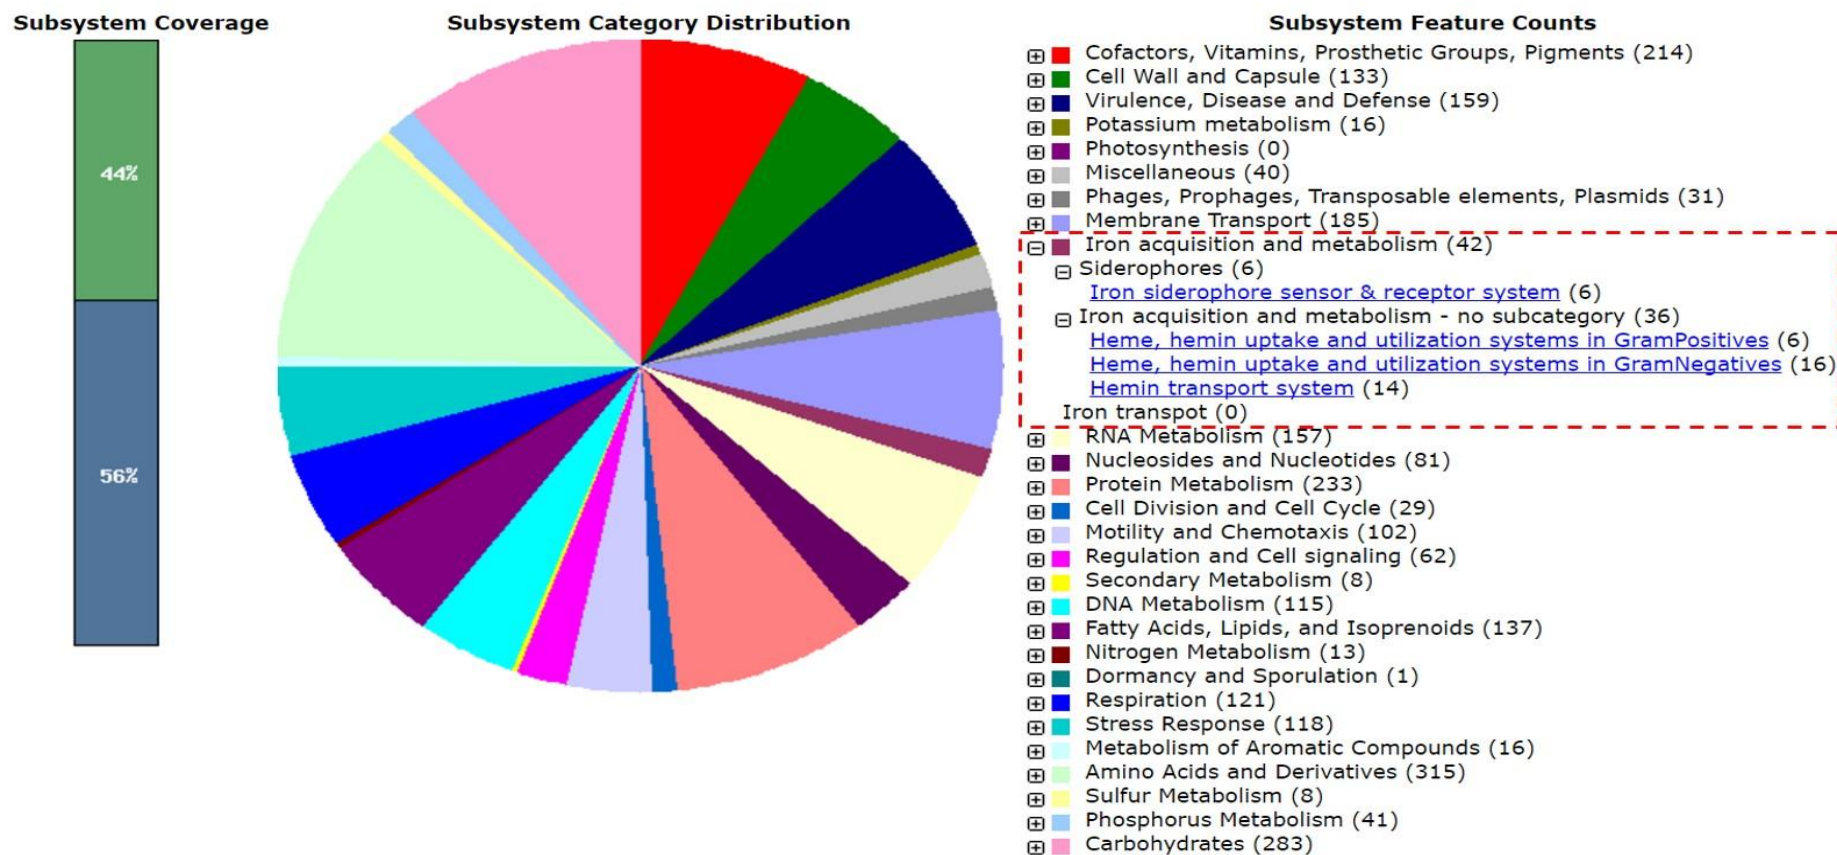

**Figure S3: RAST subsystem information (subsystem statistics) for *S. maltophilia* D457.** The subsystem features count for the iron acquisition and metabolism were 42/2660 (**marked red in box**), subcategorized under siderophore (6), iron acquisition and metabolism – no subcategory (36) and iron transport (0). The functional roles were “iron siderophore sensor & receptor system (6)”; “heme, hemin uptake and utilization systems in Gram-Positives (6)”; “heme, hemin uptake and utilization systems in Gram-Negatives (16)” and “hemin transport system (14)”.



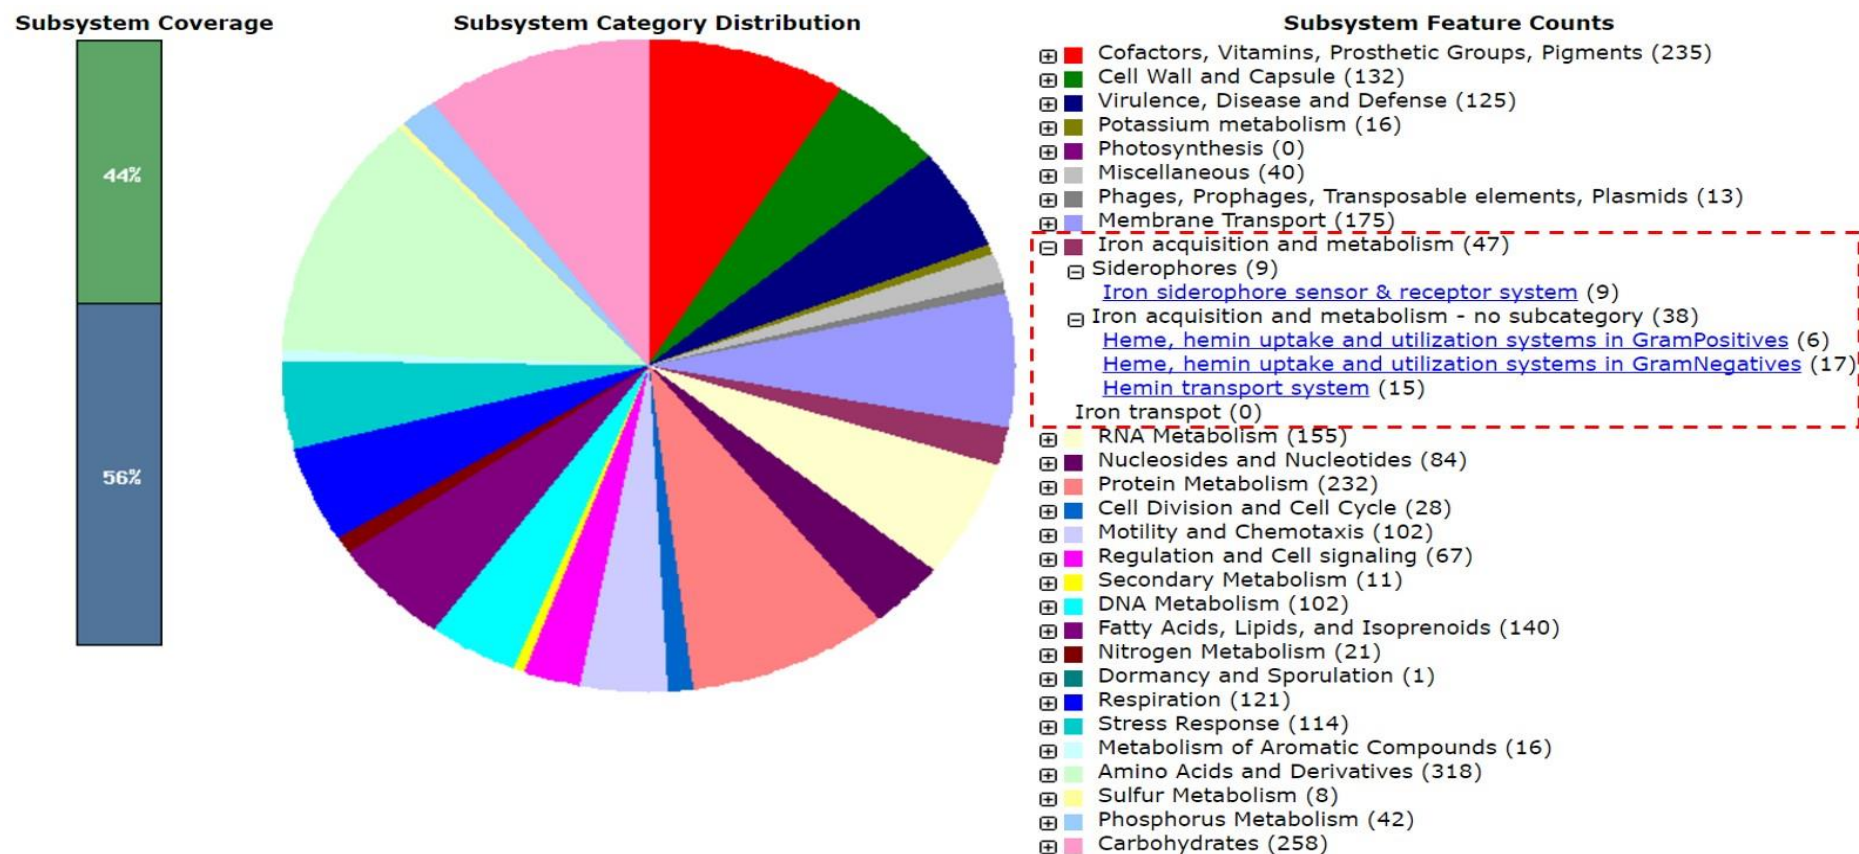

**Figure S4: RAST subsystem information (subsystem statistics) for *S. maltophilia* JV3.** The subsystem features count for the iron acquisition and metabolism were 47/2603 (**marked red in box**), subcategorized under siderophore (9), iron acquisition and metabolism – no subcategory (38) and iron transport (0). The functional roles were “iron siderophore sensor & receptor system (9)”; “heme,hemin uptake and utilization systems in Gram-Positives (6)”; “heme, hemin uptake and utilization systems in Gram-Negatives (17)” and “hemin transport system (15)”
