# Supplementary material for: Putative Iron Acquisition Systems in Stenotrophomonas maltophilia
Source: MDPI journal article supplement (doi:10.3390/molecules23082048), 2018-08-16
Supplement: s1 [file s1]

## Sigma factor ECF subfamily (FeSreg)

| Description                                                                      | Max score | Total score | Query cover | E value | Ident | Accession                  |
|----------------------------------------------------------------------------------|-----------|-------------|-------------|---------|-------|----------------------------|
| <a href="#">Stenotrophomonas maltophilia K279a complete genome, strain K279a</a> | 459       | 459         | 100%        | 2e-125  | 97%   | <a href="#">AM743169.1</a> |
| <a href="#">Stenotrophomonas maltophilia strain 13637 genome</a>                 | 448       | 448         | 100%        | 4e-122  | 96%   | <a href="#">CP008838.1</a> |
| <a href="#">Stenotrophomonas maltophilia strain ISMMS3, complete genome</a>      | 431       | 431         | 100%        | 4e-117  | 95%   | <a href="#">CP011010.1</a> |
| <a href="#">Stenotrophomonas maltophilia R551-3, complete genome</a>             | 420       | 420         | 100%        | 9e-114  | 94%   | <a href="#">CP001111.1</a> |
| <a href="#">Stenotrophomonas maltophilia D457 complete genome</a>                | 409       | 409         | 100%        | 2e-110  | 93%   | <a href="#">HE798556.1</a> |
| <a href="#">Stenotrophomonas maltophilia JV3, complete genome</a>                | 403       | 403         | 100%        | 9e-109  | 93%   | <a href="#">CP002986.1</a> |
| <a href="#">Stenotrophomonas maltophilia strain ISMMS2, complete genome</a>      | 392       | 392         | 100%        | 2e-105  | 92%   | <a href="#">CP011305.1</a> |
| <a href="#">Stenotrophomonas maltophilia strain ISMMS2R, complete genome</a>     | 392       | 392         | 100%        | 2e-105  | 92%   | <a href="#">CP011306.1</a> |

### Stenotrophomonas maltophilia K279a complete genome, strain K279a

Sequence ID: [emb|AM743169.1](#) Length: 4851126 Number of Matches: 1

Range 1: 2742086 to 2742360 [GenBank](#) [Graphics](#)

▼ Next Match ▲ Previous Match

| Score         | Expect                                                       | Identities   | Gaps      | Strand     |
|---------------|--------------------------------------------------------------|--------------|-----------|------------|
| 459 bits(248) | 2e-125                                                       | 266/275(97%) | 0/275(0%) | Plus/Minus |
| Query 1       | TTCATCGCGCGCTATCTCGACCCGGCCAGTACCGAGGACACCCTGCAGAACCTGTACCTG | 60           |           |            |
| Sbjct 2742360 | TTCATCGCGCGCTATCTCGACCCGGCCAGTACCGAGGACACCCTGCAGAACCTGTACCTG | 2742301      |           |            |
| Query 61      | AAGGCCAGCAGCGTGCCCGGCGATCCGCCATCCTCGAGCCGCGCGGCTATCTGTACCGG  | 120          |           |            |
| Sbjct 2742300 | AAGGCCAGCAGCGTGCCCGGCGATCCGCCATCCTCGAGCCGCGCGGCTATCTGTACCGG  | 2742241      |           |            |
| Query 121     | ATGGCCTACCACACGCGCTCAACCGCAGCCAGTCCGACGCCCGCGAGCGGCGTGCCATG  | 180          |           |            |
| Sbjct 2742240 | ATGGCCTACCACACGCGCTCAACCGCAGCCAGTCCGACGCCCGCGAGCGGCGTGCCATG  | 2742181      |           |            |
| Query 181     | GCCGAGTACGCCCTCGACATGGCCGAGGCCAGCCGCGATGGCGAGGCGCAGGCGCTGGAC | 240          |           |            |
| Sbjct 2742180 | GCCGAGTACGCCCTCGACATGGCCGAGGCCAGCCGCGATGGCGAGGCGCAGGCGCTGGAC | 2742121      |           |            |
| Query 241     | CAGGCGCAGCTGCGCGAGATCACCCGGACCATCCT                          | 275          |           |            |
| Sbjct 2742120 | CAGGCACAACGCGCGAGATCACCCGGACCATCCT                           | 2742086      |           |            |

### Stenotrophomonas maltophilia K279a complete genome, strain K279a

GenBank: AM743169.1

| FEATURES | Location/Qualifiers                                                                                                                                                          |
|----------|------------------------------------------------------------------------------------------------------------------------------------------------------------------------------|
| source   | 1..275                                                                                                                                                                       |
|          | <a href="#">/organism="Stenotrophomonas maltophilia K279a"</a>                                                                                                               |
|          | <a href="#">/mol_type="genomic DNA"</a>                                                                                                                                      |
|          | <a href="#">/strain="K279a"</a>                                                                                                                                              |
|          | <a href="#">/db_xref="taxon:522373"</a>                                                                                                                                      |
|          | <a href="#">/country="United Kingdom"</a>                                                                                                                                    |
| gene     | complement(<1..>275)                                                                                                                                                         |
|          | <a href="#">/locus_tag="Smlt2716"</a>                                                                                                                                        |
| CDS      | complement(<1..>275)                                                                                                                                                         |
|          | <a href="#">/locus_tag="Smlt2716"</a>                                                                                                                                        |
|          | <a href="#">/note="similarity:fasta; BB4742; bbronchiseptica; ECF sigma factor; length 177 aa; id=39.8%; E()=1.7e-11; 133 aa overlap; query 6-136 aa; subject 30-162 aa"</a> |
|          | <a href="#">/codon_start=1</a>                                                                                                                                               |
|          | <a href="#">/transl_table=11</a>                                                                                                                                             |
|          | <a href="#">/product="putative ECF sigma factor"</a>                                                                                                                         |

## Iron siderophore receptor protein (FeSR)

| Description                                                                     | Max score | Total score | Query cover | E value | Ident | Accession                  |
|---------------------------------------------------------------------------------|-----------|-------------|-------------|---------|-------|----------------------------|
| <a href="#">Stenotrophomonas maltophilia D457 complete genome</a>               | 484       | 484         | 98%         | 3e-133  | 99%   | <a href="#">HE798556.1</a> |
| <a href="#">Stenotrophomonas maltophilia JV3 complete genome</a>                | 401       | 401         | 97%         | 3e-108  | 94%   | <a href="#">CP002986.1</a> |
| <a href="#">Stenotrophomonas maltophilia strain ISMMS2 complete genome</a>      | 396       | 396         | 97%         | 1e-106  | 94%   | <a href="#">CP011305.1</a> |
| <a href="#">Stenotrophomonas maltophilia strain ISMMS2R complete genome</a>     | 396       | 396         | 97%         | 1e-106  | 94%   | <a href="#">CP011306.1</a> |
| <a href="#">Stenotrophomonas maltophilia K279a complete genome strain K279a</a> | 390       | 390         | 100%        | 7e-105  | 93%   | <a href="#">AM743169.1</a> |
| <a href="#">Stenotrophomonas maltophilia strain 13637 genome</a>                | 385       | 385         | 100%        | 3e-103  | 92%   | <a href="#">CP008838.1</a> |
| <a href="#">Stenotrophomonas maltophilia R551-3 complete genome</a>             | 385       | 385         | 98%         | 3e-103  | 93%   | <a href="#">CP001111.1</a> |
| <a href="#">Stenotrophomonas maltophilia strain ISMMS3 complete genome</a>      | 357       | 357         | 98%         | 7e-95   | 91%   | <a href="#">CP011010.1</a> |

### Stenotrophomonas maltophilia D457 complete genome

Sequence ID: [emb|HE798556.1](#) Length: 4769156 Number of Matches: 1

Range 1: 3908959 to 3909226 [GenBank](#) [Graphics](#)

▼ Next Match ▲ Previous Match

| Score         | Expect                                                        | Identities   | Gaps      | Strand     |
|---------------|---------------------------------------------------------------|--------------|-----------|------------|
| 484 bits(262) | 3e-133                                                        | 266/268(99%) | 0/268(0%) | Plus/Minus |
| Query 4       | TCGCAGCGTACCTACCTCGACGCGGACCTGATCTCCAGCCTGACCATCACCAAGGGCCCCG | 63           |           |            |
| Sbjct 3909226 | TCGCAGCGCACCTACCTCGACCGGACCTGATCTCCAGCCTGACCATCACCAAGGGCCCCG  | 3909167      |           |            |
| Query 64      | AGCCTGCAGGCCAACGCGTCCGGTGGCATCGGCGGCGTGGTCGAGATGGAGACGTTGAAG  | 123          |           |            |
| Sbjct 3909166 | AGCCTGCAGGCCAACGCGTCCGGTGGCATCGGCGGCGTGGTCGAGATGGAGACGTTGAAG  | 3909107      |           |            |
| Query 124     | ATCGGTGACGTGCTGCGCGAGGGCCGCGACGTGCGCGTGCCTGCGCGGCGGCGCTGGCC   | 183          |           |            |
| Sbjct 3909106 | ATCGGTGACGTGCTGCGCGAGGGCCGCGACGTGCGCGTGCCTGCGCGGCGGCGCTGGCC   | 3909047      |           |            |
| Query 184     | AATGGCAGTGCCAAACAGCCTGCCGTCTACAGTGCAGGACCGCGCACCGATCGCAGCGCC  | 243          |           |            |
| Sbjct 3909046 | AATGGCAGTGCCAAACAGCCTGCCGTCTACAGTGCAGGACCGCGCACCGATCGCAGCGCC  | 3908987      |           |            |
| Query 244     | ACCGGCAGCCAGTTCTTCAACGTGGCCG                                  | 271          |           |            |
| Sbjct 3908986 | ACCGGCAGCCAGTTCTTCAACGTGGCCG                                  | 3908959      |           |            |

## Stenotrophomonas maltophilia D457 complete genome

GenBank: HE798556.1

### FEATURES

source

Location/Qualifiers

1..268

/organism="Stenotrophomonas maltophilia D457"

/mol\_type="genomic DNA"

/strain="D457"

/db\_xref="taxon:1163399"

/country="Spain:Mostoles"

gene

complement(<1..>268)

/locus\_tag="SMD\_3500"

CDS

complement(<1..>268)

/locus\_tag="SMD\_3500"

/codon\_start=1

/transl\_table=11

/product="Iron siderophore receptor protein"



## Iron siderophore sensor protein (FeSS)

| Description                                                                      | Max score | Total score | Query cover | E value | Ident | Accession                  |
|----------------------------------------------------------------------------------|-----------|-------------|-------------|---------|-------|----------------------------|
| <a href="#">Stenotrophomonas maltophilia K279a complete genome, strain K279a</a> | 427       | 427         | 100%        | 4e-116  | 99%   | <a href="#">AM743169.1</a> |
| <a href="#">Stenotrophomonas maltophilia strain 13637 genome</a>                 | 411       | 411         | 100%        | 4e-111  | 98%   | <a href="#">CP008838.1</a> |
| <a href="#">Stenotrophomonas maltophilia strain ISMMS2, complete genome</a>      | 311       | 311         | 100%        | 5e-81   | 90%   | <a href="#">CP011305.1</a> |
| <a href="#">Stenotrophomonas maltophilia strain ISMMS2R, complete genome</a>     | 311       | 311         | 100%        | 5e-81   | 90%   | <a href="#">CP011306.1</a> |
| <a href="#">Stenotrophomonas maltophilia R551-3, complete genome</a>             | 285       | 285         | 99%         | 3e-73   | 89%   | <a href="#">CP001111.1</a> |
| <a href="#">Stenotrophomonas maltophilia strain ISMMS3, complete genome</a>      | 272       | 272         | 100%        | 2e-69   | 87%   | <a href="#">CP011010.1</a> |

### Stenotrophomonas maltophilia K279a complete genome, strain K279a

Sequence ID: [emb|AM743169.1](#) Length: 4851126 Number of Matches: 1

Range 1: 3988174 to 3988410 [GenBank](#) [Graphics](#)

▼ Next Match ▲ Previous Match

| Score         | Expect                                                      | Identities   | Gaps      | Strand     |
|---------------|-------------------------------------------------------------|--------------|-----------|------------|
| 427 bits(231) | 4e-116                                                      | 235/237(99%) | 0/237(0%) | Plus/Minus |
| Query 1       | ACGTCGTCGAGAACGTAACGCTGCCGATGGCAGCCGCGCAGTGTGGATGCGGACAGCG  |              |           | 60         |
| Sbjct 3988410 | ACGTCGTCGAGAACGTAACGCTGCCGATGGCAGCCGCGCAGTGTGGATGCGGACAGCG  |              |           | 3988351    |
| Query 61      | CGATCGCCGTGCGCTTCGATGCGCACGACGCGAGGTTGAGCTCTGCGCGGGCGCGTCT  |              |           | 120        |
| Sbjct 3988350 | CGATCGCCGTGCGCTTCGATGCGCACGACGCGAGGTCGAGCTGCTGCGCGGGCGCGTCT |              |           | 3988291    |
| Query 121     | GGTTCGAGGTGAGCCGGATGCGCAGCGGCGTTTCAGCGTGCGTGCCGGCAATGGCGTGG |              |           | 180        |
| Sbjct 3988290 | GGTTCGAGGTGAGCCGGATGCGCAGCGGCGTTTCAGCGTGCGTGCCGGCAATGGCGTGG |              |           | 3988231    |
| Query 181     | TTGAGGACATCTCGACCGCGTTACCGTCGCGCGTGGCGATGACCTGGTGGAAACCC    |              |           | 237        |
| Sbjct 3988230 | TTGAGGACATCTCGACCGCGTTACCGTCGCGCGTGGCGATGACCTGGTGGAAACCC    |              |           | 3988174    |

## Stenotrophomonas maltophilia K279a complete genome, strain K279a

GenBank: AM743169.1

```

FEATURES             Location/Qualifiers
     source            1..237
                        /organism="Stenotrophomonas maltophilia K279a"
                        /mol_type="genomic DNA"
                        /strain="K279a"
                        /db_xref="taxon:522373"
                        /country="United Kingdom"
     gene              complement(<1..>237)
                        /locus_tag="Smlt3899"
     CDS               complement(<1..>237)
                        /locus_tag="Smlt3899"
                        /note="similarity:fasta; ECA1539; ecarotovora_atroseptica;
                        putative transmembrane sensor protein; length 322 aa;
                        id=31.5%; E()=3.9e-20; 317 aa overlap; query 25-318 aa;
                        subject 10-322 aa;
                        similarity:fasta; with=UniProt:Q1IGG4; Pseudomonas
                        entomophila (strain L48).; Putative FecR-like
                        transmembrane sensor.; length=325; id 33.974%; ungapped id
                        36.426%; E()=8.8e-21; 312 aa overlap; query 9-306; subject
                        7-311"
                        /codon_start=1
                        /transl_table=11
                        /product="putative transmembrane FecR sensor protein"

```

## Heme oxygenase, associated with heme uptake (HemO/HO)

| Description                                                                      | Max score | Total score | Query cover | E value | Ident | Accession                  |
|----------------------------------------------------------------------------------|-----------|-------------|-------------|---------|-------|----------------------------|
| <a href="#">Stenotrophomonas maltophilia strain 13637 genome</a>                 | 520       | 520         | 100%        | 8e-144  | 100%  | <a href="#">CP008838.1</a> |
| <a href="#">Stenotrophomonas maltophilia K279a complete genome, strain K279a</a> | 514       | 514         | 100%        | 4e-142  | 99%   | <a href="#">AM743169.1</a> |
| <a href="#">Stenotrophomonas maltophilia R551-3, complete genome</a>             | 436       | 436         | 100%        | 9e-119  | 95%   | <a href="#">CP001111.1</a> |
| <a href="#">Stenotrophomonas maltophilia D457 complete genome</a>                | 431       | 431         | 100%        | 4e-117  | 94%   | <a href="#">HE798556.1</a> |
| <a href="#">Stenotrophomonas maltophilia JV3, complete genome</a>                | 431       | 431         | 100%        | 4e-117  | 94%   | <a href="#">CP002986.1</a> |
| <a href="#">Stenotrophomonas maltophilia strain ISMMS2, complete genome</a>      | 364       | 364         | 100%        | 4e-97   | 90%   | <a href="#">CP011305.1</a> |
| <a href="#">Stenotrophomonas maltophilia strain ISMMS2R, complete genome</a>     | 364       | 364         | 100%        | 4e-97   | 90%   | <a href="#">CP011306.1</a> |
| <a href="#">Stenotrophomonas maltophilia strain ISMMS3, complete genome</a>      | 353       | 353         | 100%        | 9e-94   | 89%   | <a href="#">CP011010.1</a> |

### Stenotrophomonas maltophilia strain 13637 genome

Sequence ID: [gb|CP008838.1](#) Length: 4989312 Number of Matches: 1

Range 1: 4804541 to 4804821 [GenBank](#) [Graphics](#)

▼ Next Match ▲ Previous Match

| Score         | Expect                                                         | Identities    | Gaps      | Strand    |
|---------------|----------------------------------------------------------------|---------------|-----------|-----------|
| 520 bits(281) | 8e-144                                                         | 281/281(100%) | 0/281(0%) | Plus/Plus |
| Query 1       | CAGCAATTTGCCCCGTTTCTGCGCGTGCAAGTATCGCTTCCACCGCAGCATCGATGCGCT   | 60            |           |           |
| Sbjct 4804541 | CAGCAATTTGCCCCGTTTCTGCGCGTGCAAGTATCGCTTCCACCGCAGCATCGATGCGCT   | 4804600       |           |           |
| Query 61      | GTATGCCAACCTGCGCTGGACGCACTGCTGCCGGACCTGGGCGAGCGCCGCCCTGAC      | 120           |           |           |
| Sbjct 4804601 | GTATGCCAACCTGCGCTGGACGCACTGCTGCCGGACCTGGGCGAGCGCCGCCCTGAC      | 4804660       |           |           |
| Query 121     | CCAGGTCGCGCGCGACCTGCAGGACCTGGAGCAGACCTGCCGGGGGCTGACATCGCGGC    | 180           |           |           |
| Sbjct 4804661 | CCAGGTCGCGCGCGACCTGCAGGACCTGGAGCAGACCTGCCGGGGGCTGACATCGCGGC    | 4804720       |           |           |
| Query 181     | GTTGCCGTCCGATCTGGAAGTGCCTGCCCGCGCTTGGGGTGGCTGTACGTGGCTGAAGGCTC | 240           |           |           |
| Sbjct 4804721 | GTTGCCGTCCGATCTGGAAGTGCCTGCCCGCGCTTGGGGTGGCTGTACGTGGCTGAAGGCTC | 4804780       |           |           |
| Query 241     | CAACCTGGGCGGCAACCTCTGTACAAGATGGCTGCCAAGC                       | 281           |           |           |
| Sbjct 4804781 | CAACCTGGGCGGCAACCTCTGTACAAGATGGCTGCCAAGC                       | 4804821       |           |           |

## Stenotrophomonas maltophilia strain 13637 genome

GenBank: CP008838.1

| FEATURES | Location/Qualifiers                                      |
|----------|----------------------------------------------------------|
| source   | 1..281                                                   |
|          | <a href="#">/organism="Stenotrophomonas maltophilia"</a> |
|          | <a href="#">/mol_type="genomic DNA"</a>                  |
|          | <a href="#">/strain="13637"</a>                          |
|          | <a href="#">/db_xref="taxon:40324"</a>                   |
| gene     | <1..>281                                                 |
|          | <a href="#">/locus_tag="DP16_4486"</a>                   |
| CDS      | <1..>281                                                 |
|          | <a href="#">/locus_tag="DP16_4486"</a>                   |
|          | <a href="#">/codon_start=1</a>                           |
|          | <a href="#">/transl_table=11</a>                         |
|          | <a href="#">/product="heme oxygenase family protein"</a> |



## Heme ABC transporter, ATPase component (HmuV)

| Description                                                                      | Max score | Total score | Query cover | E value | Ident | Accession                  |
|----------------------------------------------------------------------------------|-----------|-------------|-------------|---------|-------|----------------------------|
| <a href="#">Stenotrophomonas maltophilia K279a complete genome, strain K279a</a> | 483       | 483         | 100%        | 1e-132  | 99%   | <a href="#">AM743169.1</a> |
| <a href="#">Stenotrophomonas maltophilia strain 13637 genome</a>                 | 477       | 477         | 100%        | 5e-131  | 98%   | <a href="#">CP008838.1</a> |
| <a href="#">Stenotrophomonas maltophilia D457 complete genome</a>                | 383       | 383         | 98%         | 1e-102  | 92%   | <a href="#">HE798556.1</a> |
| <a href="#">Stenotrophomonas maltophilia strain ISMMS2, complete genome</a>      | 364       | 364         | 97%         | 4e-97   | 91%   | <a href="#">CP011305.1</a> |
| <a href="#">Stenotrophomonas maltophilia strain ISMMS2R, complete genome</a>     | 364       | 364         | 97%         | 4e-97   | 91%   | <a href="#">CP011306.1</a> |
| <a href="#">Stenotrophomonas maltophilia strain ISMMS3, complete genome</a>      | 339       | 339         | 98%         | 2e-89   | 89%   | <a href="#">CP011010.1</a> |
| <a href="#">Stenotrophomonas maltophilia JV3, complete genome</a>                | 327       | 327         | 98%         | 5e-86   | 89%   | <a href="#">CP002986.1</a> |

### Stenotrophomonas maltophilia K279a complete genome, strain K279a

Sequence ID: [embjAM743169.1](#) Length: 4851126 Number of Matches: 1

Range 1: 2400245 to 2400517 [GenBank](#) [Graphics](#)

▼ Next Match ▲ Previous Match

| Score         | Expect                                                        | Identities   | Gaps      | Strand    |
|---------------|---------------------------------------------------------------|--------------|-----------|-----------|
| 483 bits(261) | 1e-132                                                        | 269/273(99%) | 0/273(0%) | Plus/Plus |
| Query 1       | GAAGCTGCATGAGGTGGTGGTGCGCCGCCAGCAGCGCGAGATCCTGCATGGCATCTCGCT  | 60           |           |           |
| Sbjct 2400245 | GAAGCTGCATGAGGTGGTGGTGCGCCGCCAGCAGCGCGAGATCCTGCATGGCATCTCGCT  | 2400304      |           |           |
| Query 61      | CGCGTTTCGAGCCGGGTACCGTGATCGCGCTGGTTGGCCCGAACGGCGCAGGCAAGTCCAC | 120          |           |           |
| Sbjct 2400305 | CGCGTTTCGAGCCGGGTACCGTGACCGCGCTGGTTGGCCCGAACGGCGCAGGCAAGTCCAC | 2400364      |           |           |
| Query 121     | CTTGCTGGCGGTAGCGGCCGGCGACCTGCGCGCCGATGCGGGCGAGGTGAGCCTGTTGGG  | 180          |           |           |
| Sbjct 2400365 | CTTGCTGGCGATAGCGGCCGGCGACCTGCGCGCCGATGCGGGCGAGGTGAGCCTGTTGGG  | 2400424      |           |           |
| Query 181     | CAAGCCGCTGGCCAGCTACAAGGCCGGGCCGCTGGCGCGCGAGCGCGCGGTAATGCCGCA  | 240          |           |           |
| Sbjct 2400425 | CAAACCGCTGGCCAGCTACAAGGCCGGGCCGCTGGCGCGCGAGCGCGCGGTAATGCCGCA  | 2400484      |           |           |
| Query 241     | GGAGCACGGCGTTTCGTTTCGCCCTTCAGCGTAGA                           | 273          |           |           |
| Sbjct 2400485 | GGAGCACGGCGTTTCGTTTCGCCCTTCAGCGTAGA                           | 2400517      |           |           |

## Stenotrophomonas maltophilia K279a complete genome, strain K279a

GenBank: AM743169.1

| FEATURES | Location/Qualifiers                                                                                                                                            |
|----------|----------------------------------------------------------------------------------------------------------------------------------------------------------------|
| source   | 1..273<br>/organism="Stenotrophomonas maltophilia K279a"<br>/mol_type="genomic DNA"<br>/strain="K279a"<br>/db_xref="taxon:522373"<br>/country="United Kingdom" |
| gene     | <1..>273<br>/locus_tag="Smlt2357"                                                                                                                              |
| CDS      | <1..>273<br>/locus_tag="Smlt2357"<br>/codon_start=1<br>/transl_table=11<br>/product="putative ABC transport protein, ATP-binding component."                   |

## Hypothetical protein related to heme utilization (Hyp1)

| Description                                                                      | Max score | Total score | Query cover | E value | Ident | Accession                  |
|----------------------------------------------------------------------------------|-----------|-------------|-------------|---------|-------|----------------------------|
| <a href="#">Stenotrophomonas maltophilia strain 13637 genome</a>                 | 424       | 424         | 100%        | 6e-115  | 98%   | <a href="#">CP008838.1</a> |
| <a href="#">Stenotrophomonas maltophilia K279a complete genome, strain K279a</a> | 424       | 424         | 100%        | 6e-115  | 98%   | <a href="#">AM743169.1</a> |
| <a href="#">Stenotrophomonas maltophilia strain ISMMS2, complete genome</a>      | 379       | 379         | 100%        | 1e-101  | 94%   | <a href="#">CP011305.1</a> |
| <a href="#">Stenotrophomonas maltophilia strain ISMMS2R, complete genome</a>     | 379       | 379         | 100%        | 1e-101  | 94%   | <a href="#">CP011306.1</a> |
| <a href="#">Stenotrophomonas maltophilia D457 complete genome</a>                | 379       | 379         | 100%        | 1e-101  | 94%   | <a href="#">HE798556.1</a> |
| <a href="#">Stenotrophomonas maltophilia R551-3, complete genome</a>             | 379       | 379         | 100%        | 1e-101  | 94%   | <a href="#">CP001111.1</a> |
| <a href="#">Stenotrophomonas maltophilia JV3, complete genome</a>                | 368       | 368         | 100%        | 3e-98   | 94%   | <a href="#">CP002986.1</a> |
| <a href="#">Stenotrophomonas maltophilia strain ISMMS3, complete genome</a>      | 357       | 357         | 100%        | 6e-95   | 93%   | <a href="#">CP011010.1</a> |

### Stenotrophomonas maltophilia strain 13637 genome

Sequence ID: [gb|CP008838.1](#) Length: 4989312 Number of Matches: 1

Range 1: 4601859 to 4602105 [GenBank](#) [Graphics](#)

▼ Next Match ▲ Previous Match

| Score         | Expect                                                        | Identities   | Gaps      | Strand    |
|---------------|---------------------------------------------------------------|--------------|-----------|-----------|
| 424 bits(229) | 6e-115                                                        | 241/247(98%) | 0/247(0%) | Plus/Plus |
| Query 1       | GGCATCGTCGGCATCTTCGTGCCGGGCTGCCGACCACCGTATTCATCCTGATTTGGGCC   | 60           |           |           |
| Sbjct 4601859 | GGCATCGTCGGCATCTTCGTACCGGGCTGCCGACCACCGTATTCATCCTGATTTGGGCC   | 4601918      |           |           |
| Query 61      | TGGGCGCGCTCGCGTGGCTCCGAGCGCTGCACAACCTGGCTGCTGCAGCATCCACGCTTC  | 120          |           |           |
| Sbjct 4601919 | TGGGCGCGCTCGCGTGGCTCCGAAACGCTGCACAACCTGGCTGCTGCAGCATCCACGCTTC | 4601978      |           |           |
| Query 121     | GGCCCGGCCATCGCCAACCTGGCAGGCACACGGGGCGGTACGCCGCTATGGCAAGTGGATG | 180          |           |           |
| Sbjct 4601979 | GGCCCGGCCATCGCCAACCTGGCAGGCACACGGGGCGGTACGCCGCTACGGCAAGTGGATG | 4602038      |           |           |
| Query 181     | GCCACGATCACCATGGCGGTATGCGCGGCCATCATGCTGTGGTGCCTACCGATTGCCTGG  | 240          |           |           |
| Sbjct 4602039 | GCCACGATCACCATGGCGGTATGCGCGGCCATCATGCTGTGGTGCCTACCGATTGCCTGG  | 4602098      |           |           |
| Query 241     | GTGAAGT                                                       | 247          |           |           |
| Sbjct 4602099 | GTGAAGT                                                       | 4602105      |           |           |

## Stenotrophomonas maltophilia strain 13637 genome

GenBank: CP008838.1

### FEATURES

source

Location/Qualifiers

1..247

/organism="Stenotrophomonas maltophilia"

/mol\_type="genomic DNA"

/strain="13637"

/db\_xref="taxon:40324"

gene

<1..>247

/locus\_tag="DP16\_4312"

CDS

<1..>247

/locus\_tag="DP16\_4312"

/note="conserved hypothetical protein"

/codon\_start=1

/transl\_table=11

/product="hypothetical protein"



## Heme ABC transporter, permease protein (HmuU)

| Description                                                                      | Max score | Total score | Query cover | E value | Ident | Accession                  |
|----------------------------------------------------------------------------------|-----------|-------------|-------------|---------|-------|----------------------------|
| <a href="#">Stenotrophomonas maltophilia K279a complete genome, strain K279a</a> | 420       | 420         | 100%        | 1e-113  | 92%   | <a href="#">AM743169.1</a> |
| <a href="#">Stenotrophomonas maltophilia strain ISMMS3, complete genome</a>      | 403       | 403         | 100%        | 1e-108  | 91%   | <a href="#">CP011010.1</a> |
| <a href="#">Stenotrophomonas maltophilia D457 complete genome</a>                | 398       | 398         | 100%        | 4e-107  | 91%   | <a href="#">HE798556.1</a> |
| <a href="#">Stenotrophomonas maltophilia R551-3, complete genome</a>             | 398       | 398         | 100%        | 4e-107  | 91%   | <a href="#">CP001111.1</a> |
| <a href="#">Stenotrophomonas maltophilia JV3, complete genome</a>                | 381       | 381         | 100%        | 4e-102  | 90%   | <a href="#">CP002986.1</a> |
| <a href="#">Stenotrophomonas maltophilia strain ISMMS2, complete genome</a>      | 375       | 375         | 100%        | 2e-100  | 89%   | <a href="#">CP011305.1</a> |
| <a href="#">Stenotrophomonas maltophilia strain ISMMS2R, complete genome</a>     | 375       | 375         | 100%        | 2e-100  | 89%   | <a href="#">CP011306.1</a> |

### Stenotrophomonas maltophilia K279a complete genome, strain K279a

Sequence ID: [emb|AM743169.1](#) Length: 4851126 Number of Matches: 1

Range 1: 2399866 to 2400164 [GenBank](#) [Graphics](#)

▼ Next Match ▲ Previous Match

| Score         | Expect                                                       | Identities   | Gaps      | Strand    |
|---------------|--------------------------------------------------------------|--------------|-----------|-----------|
| 420 bits(227) | 1e-113                                                       | 275/299(92%) | 0/299(0%) | Plus/Plus |
| Query 1       | ACGCCATTGGACATGCTGGCGCTGGGCGAGCGCCAGGCCAGCACCTGGGGCTGGATGTG  | 60           |           |           |
| Sbjct 2399866 | ACGCCATTGGACATGCTGGCGCTGGGCGAACGCCAGGCGCAGCACCTCGGGCTGGACGTG | 2399925      |           |           |
| Query 61      | ACCCGCACGCGGGCTCGACTGGTGGCGTTACGCGCGCTGCTGGTGGGGGCGGCGGTGGCG | 120          |           |           |
| Sbjct 2399926 | ACCCGCACGCGGGCTCGCTGGTGGCGTTCAGTGCGCTGCTGGTGGGCGCGGCGGTGGCC  | 2399985      |           |           |
| Query 121     | TTTGCGGGCTCGATCAGCTTCGTTGGCCTGGTGGTCCGCGACGTGGCGCGCTGCTGGTG  | 180          |           |           |
| Sbjct 2399986 | TTTGCGGGTTCGATCAGTTTCGTTGGCCTGGTAGTGCCGCGACGTGGCGCGCTGCTGGTG | 2400045      |           |           |
| Query 181     | GGTCCCGGTATCGCTGGCTGCTGCCGTTGTCCGGCCTGCTGGGTGCACTGCTGATCGTG  | 240          |           |           |
| Sbjct 2400046 | GGCCCCGGGATCGCTGGCTGCTGCCGTTGTCCGGCCTGCTGGGCGCGCTGCTGATCGTG  | 2400105      |           |           |
| Query 241     | GTGGCGGATACGGCCGCGCGCACGCTGGATCCGCCCGCGGAGATTCCGCTGGGCTTGT   | 299          |           |           |
| Sbjct 2400106 | GTGGCCGACACCGCGGCCCGCACGCTCGATCCGCCGCGGAGATTCCGCTGGGCTTGT    | 2400164      |           |           |

## Stenotrophomonas maltophilia K279a complete genome, strain K279a

GenBank: AM743169.1

### FEATURES

source

Location/Qualifiers

1..299

/organism="Stenotrophomonas maltophilia K279a"

/mol\_type="genomic DNA"

/strain="K279a"

/db\_xref="taxon:522373"

/country="United Kingdom"

gene

<1..>299

/locus\_tag="Smlt2356"

CDS

<1..>299

/locus\_tag="Smlt2356"

/codon\_start=1

/transl\_table=11

/product="putative FecCD-family transmembrane transport protein."

## Heme ABC transporter, cell surface heme and hemoprotein receptor (HmuT)

| Description                                                                      | Max score | Total score | Query cover | E value | Ident | Accession                  |
|----------------------------------------------------------------------------------|-----------|-------------|-------------|---------|-------|----------------------------|
| <a href="#">Stenotrophomonas maltophilia D457 complete genome</a>                | 499       | 499         | 100%        | 1e-137  | 97%   | <a href="#">HE798556.1</a> |
| <a href="#">Stenotrophomonas maltophilia strain 13637 genome</a>                 | 455       | 455         | 100%        | 3e-124  | 94%   | <a href="#">CP008838.1</a> |
| <a href="#">Stenotrophomonas maltophilia K279a complete genome, strain K279a</a> | 455       | 455         | 100%        | 3e-124  | 94%   | <a href="#">AM743169.1</a> |
| <a href="#">Stenotrophomonas maltophilia strain ISMMS2, complete genome</a>      | 444       | 444         | 100%        | 6e-121  | 93%   | <a href="#">CP011305.1</a> |
| <a href="#">Stenotrophomonas maltophilia strain ISMMS2R, complete genome</a>     | 444       | 444         | 100%        | 6e-121  | 93%   | <a href="#">CP011306.1</a> |
| <a href="#">Stenotrophomonas maltophilia JV3, complete genome</a>                | 444       | 444         | 100%        | 6e-121  | 93%   | <a href="#">CP002986.1</a> |
| <a href="#">Stenotrophomonas maltophilia R551-3, complete genome</a>             | 427       | 427         | 100%        | 6e-116  | 92%   | <a href="#">CP001111.1</a> |
| <a href="#">Stenotrophomonas maltophilia strain ISMMS3, complete genome</a>      | 399       | 399         | 100%        | 1e-107  | 91%   | <a href="#">CP011010.1</a> |

### Stenotrophomonas maltophilia D457 complete genome

Sequence ID: [emb|HE798556.1](#) Length: 4769156 Number of Matches: 1

Range 1: 2356617 to 2356916 [GenBank](#) [Graphics](#)

▼ Next Match ▲ Previous Match

| Score         | Expect                                                         | Identities   | Gaps      | Strand    |
|---------------|----------------------------------------------------------------|--------------|-----------|-----------|
| 499 bits(270) | 1e-137                                                         | 290/300(97%) | 0/300(0%) | Plus/Plus |
| Query 1       | CATGCGCCACGACTGATCCACGTCTCGGCAACCGGCGCTGGCGGCTCGCCCACTGTTGCC   | 60           |           |           |
| Sbjct 2356617 | CATGCGCCACGACTGATCCACGTATCGGCCACCGGCGCTGGCGGCTCGCCCACTGTTGCC   | 2356676      |           |           |
| Query 61      | GGTGCCGACAGCGCGTCCGCGCAGCTGATCGCCCTGGCCGGCGGCATCAACATCGGCACC   | 120          |           |           |
| Sbjct 2356677 | GGTGCCGACAGCGCGTCCGCGCAGCTGATCGCGCTGGCCGGCGGCATCAACATCGGCACC   | 2356736      |           |           |
| Query 121     | GAGGCCGGGGTGAAGAAGTACTCGCAGCTGAGCAACGAGGGCGTGGTGGCGGCGGCACCG   | 180          |           |           |
| Sbjct 2356737 | GAGGCCGGGGTGAAGAAGTACTCGCAGCTGAGCAACGAGGGGGTGGTGGCGGCGGCACCG   | 2356796      |           |           |
| Query 181     | GAAAGTGATCCTGGTGACCGAGCATGACCTGCAGCTGTTCCGGCGGTGCCGAAGGCCTGTGG | 240          |           |           |
| Sbjct 2356797 | GAAAGTGATCCTGGTGACCGAGCATGACCTGCAGCTGTTCCGGCGGTGCCGAAGGCCTGTGG | 2356856      |           |           |
| Query 241     | AAGGCGTACCCGACGCTGAAGCAGACCCCGGCCGGGCAGGCCAATCGGGTCTGGGTGATG   | 300          |           |           |
| Sbjct 2356857 | AAGGCGTACCCGACGCTGAAGCAGACCCCGGCCGGGCAGGCCAATCGGGTCTGGGTGATG   | 2356916      |           |           |

## Stenotrophomonas maltophilia D457 complete genome

GenBank: HE798556.1

### FEATURES

source

Location/Qualifiers

1..300

/organism="Stenotrophomonas maltophilia D457"

/mol\_type="genomic DNA"

/strain="D457"

/db\_xref="taxon:1163399"

/country="Spain:Mostoles"

gene

<1..>300

/locus\_tag="SMD\_2121"

CDS

<1..>300

/locus\_tag="SMD\_2121"

/codon\_start=1

/transl\_table=11

/product="Heme ABC transporter, cell surface heme and hemoprotein receptor HmuT"



## Outer membrane receptor proteins, mostly Fe transport (Rp2)

| Description                                                                      | Max score | Total score | Query cover | E value | Ident | Accession                  |
|----------------------------------------------------------------------------------|-----------|-------------|-------------|---------|-------|----------------------------|
| <a href="#">Stenotrophomonas maltophilia JV3, complete genome</a>                | 348       | 348         | 100%        | 3e-92   | 95%   | <a href="#">CP002986.1</a> |
| <a href="#">Stenotrophomonas maltophilia D457, complete genome</a>               | 342       | 342         | 100%        | 1e-90   | 95%   | <a href="#">HE798556.1</a> |
| <a href="#">Stenotrophomonas maltophilia strain ISMMS2, complete genome</a>      | 327       | 327         | 99%         | 4e-86   | 94%   | <a href="#">CP011305.1</a> |
| <a href="#">Stenotrophomonas maltophilia strain ISMMS2R, complete genome</a>     | 327       | 327         | 99%         | 4e-86   | 94%   | <a href="#">CP011306.1</a> |
| <a href="#">Stenotrophomonas maltophilia strain ISMMS3, complete genome</a>      | 327       | 327         | 99%         | 4e-86   | 94%   | <a href="#">CP011010.1</a> |
| <a href="#">Stenotrophomonas maltophilia strain 13637 genome</a>                 | 315       | 315         | 100%        | 3e-82   | 92%   | <a href="#">CP008838.1</a> |
| <a href="#">Stenotrophomonas maltophilia K279a complete genome, strain K279a</a> | 315       | 315         | 100%        | 3e-82   | 92%   | <a href="#">AM743169.1</a> |
| <a href="#">Stenotrophomonas maltophilia R551-3, complete genome</a>             | 278       | 278         | 99%         | 4e-71   | 89%   | <a href="#">CP001111.1</a> |

### Stenotrophomonas maltophilia D457 complete genome

Sequence ID: [emb|HE798556.1](#) Length: 4769156 Number of Matches: 1

Range 1: 3781688 to 3781908 [GenBank](#) [Graphics](#)

▼ Next Match ▲ Previous Match

| Score         | Expect                                                      | Identities   | Gaps      | Strand     |
|---------------|-------------------------------------------------------------|--------------|-----------|------------|
| 342 bits(185) | 1e-90                                                       | 209/221(95%) | 0/221(0%) | Plus/Minus |
| Query 1       | AACGCATGCCCGACTACTGGGAGTTGTTCTCGCCCGACACGGCCCGGCGGTGA       | 60           |           |            |
| Sbjct 3781908 | AACGCATGCCCGACTACTGGGAGCTGTTCTCGCCCGACACGGCCCGGCGGTGA       | 3781849      |           |            |
| Query 61      | ACGCGTTTGCCGGCATCCAGCCCGAGCGCACCACCCAGCTCGACGTCGGCTGCAGTACA | 120          |           |            |
| Sbjct 3781848 | ACGCGTTTGCCGGCATCCAGCCCGAGCGCACCACCCAGCTCGACGTCGGCTGCAGTACA | 3781789      |           |            |
| Query 121     | AGGGACGACGCGTGCAGGCTGGGTCTCGGCCTACGCCGGGCAGATCCAGGACTACATCC | 180          |           |            |
| Sbjct 3781788 | AGGGACGCGCGTGCAGGCTGGGTCTCGGCCTACGCCGGGCAGATCCAGGACTACATCC  | 3781729      |           |            |
| Query 181     | TGTTACCTACCACGGCAGCGGCATGATGGGCATGAGCCAG                    | 221          |           |            |
| Sbjct 3781728 | TGTTACCTACCACGGCAGCGGCATGATGGGCATGAGCCAG                    | 3781688      |           |            |

## Stenotrophomonas maltophilia D457 complete genome

GenBank: HE798556.1

### FEATURES

source

Location/Qualifiers

1..221

/organism="Stenotrophomonas maltophilia D457"

/mol\_type="genomic DNA"

/strain="D457"

/db\_xref="taxon:1163399"

/country="Spain:Mostoles"

gene

complement(<1..>221)

/locus\_tag="SMD\_3393"

CDS

complement(<1..>221)

/locus\_tag="SMD\_3393"

/codon\_start=1

/transl\_table=11

/product="Outer membrane receptor proteins, mostly Fe transport"

## Hemin uptake protein (Hup)

| Description                                                                                         | Max score | Total score | Query cover | E value | Ident | Accession                  |
|-----------------------------------------------------------------------------------------------------|-----------|-------------|-------------|---------|-------|----------------------------|
| <a href="#">Brugia timori genome assembly B_timori_Indonesia_v1_0_4_scaffold BTMF_contig0011954</a> | 370       | 370         | 100%        | 6e-99   | 100%  | <a href="#">LK924066.1</a> |
| <a href="#">Stenotrophomonas maltophilia D457 complete genome</a>                                   | 370       | 370         | 100%        | 6e-99   | 100%  | <a href="#">HE798556.1</a> |
| <a href="#">Stenotrophomonas maltophilia strain ISMMS3, complete genome</a>                         | 364       | 364         | 100%        | 3e-97   | 99%   | <a href="#">CP011010.1</a> |
| <a href="#">Stenotrophomonas maltophilia JV3, complete genome</a>                                   | 359       | 359         | 100%        | 1e-95   | 99%   | <a href="#">CP002986.1</a> |
| <a href="#">Stenotrophomonas maltophilia R551-3, complete genome</a>                                | 359       | 359         | 100%        | 1e-95   | 99%   | <a href="#">CP001111.1</a> |
| <a href="#">Stenotrophomonas maltophilia K279a complete genome, strain K279a</a>                    | 359       | 359         | 100%        | 1e-95   | 99%   | <a href="#">AM743169.1</a> |
| <a href="#">Stenotrophomonas maltophilia strain ISMMS2, complete genome</a>                         | 353       | 353         | 100%        | 6e-94   | 99%   | <a href="#">CP011305.1</a> |
| <a href="#">Stenotrophomonas maltophilia strain ISMMS2R, complete genome</a>                        | 353       | 353         | 100%        | 6e-94   | 99%   | <a href="#">CP011306.1</a> |
| <a href="#">Stenotrophomonas maltophilia strain 13637 genome</a>                                    | 353       | 353         | 100%        | 6e-94   | 99%   | <a href="#">CP008838.1</a> |

### Stenotrophomonas maltophilia D457 complete genome

Sequence ID: [emb|HE798556.1](#) Length: 4769156 Number of Matches: 1

Range 1: 784415 to 784614 [GenBank](#) [Graphics](#)

▼ Next Match ▲ Previous Match

| Score         | Expect                                                       | Identities    | Gaps      | Strand    |
|---------------|--------------------------------------------------------------|---------------|-----------|-----------|
| 370 bits(200) | 6e-99                                                        | 200/200(100%) | 0/200(0%) | Plus/Plus |
| Query 1       | ATGCTCATGAATGCTCAACCTGTACTGCTGCGCCCCGAAACGCTGACCTCCGCGATCGT  | 60            |           |           |
| Sbjct 784415  | ATGCTCATGAATGCTCAACCTGTACTGCTGCGCCCCGAAACGCTGACCTCCGCGATCGT  | 784474        |           |           |
| Query 61      | CCGGTCCGTGTCGTTCCGCCGGAAGAGGTCATCGACAGCGAAGCCCTGCTCAAGGGCCGT | 120           |           |           |
| Sbjct 784475  | CCGGTCCGTGTCGTTCCGCCGGAAGAGGTCATCGACAGCGAAGCCCTGCTCAAGGGCCGT | 784534        |           |           |
| Query 121     | CGTGAAATCCTGATCCAGCACGGCGACCGCTTCTATCGCCTGCGGCACACCAGCAACGAC | 180           |           |           |
| Sbjct 784535  | CGTGAAATCCTGATCCAGCACGGCGACCGCTTCTATCGCCTGCGGCACACCAGCAACGAC | 784594        |           |           |
| Query 181     | AAGCTGATCCTGACCAAGTA                                         | 200           |           |           |
| Sbjct 784595  | AAGCTGATCCTGACCAAGTA                                         | 784614        |           |           |

### Stenotrophomonas maltophilia D457 complete genome

GenBank: HE798556.1

#### FEATURES

source

Location/Qualifiers

1..200

/organism="Stenotrophomonas maltophilia D457"

/mol\_type="genomic DNA"

/strain="D457"

/db\_xref="taxon:1163399"

/country="Spain:Mostoles"

gene

7..>200

/locus\_tag="SMD\_0678"

CDS

7..>200

/locus\_tag="SMD\_0678"

/codon\_start=1

/transl\_table=11

/product="Hemin uptake protein"



## Electron transfer flavoprotein, beta subunit (ETFb)

| Description                                                                                              | Max score | Total score | Query cover | E value | Ident | Accession                      |
|----------------------------------------------------------------------------------------------------------|-----------|-------------|-------------|---------|-------|--------------------------------|
| <a href="#">Stenotrophomonas maltophilia D457 complete genome</a>                                        | 398       | 398         | 100%        | 3e-107  | 100%  | <a href="#">HE798556.1</a>     |
| <a href="#">Stenotrophomonas maltophilia R551-3, complete genome</a>                                     | 392       | 392         | 100%        | 1e-105  | 99%   | <a href="#">CP001111.1</a>     |
| <a href="#">Stenotrophomonas maltophilia strain ISMMS2, complete genome</a>                              | 381       | 381         | 100%        | 3e-102  | 99%   | <a href="#">CP011305.1</a>     |
| <a href="#">Stenotrophomonas maltophilia strain ISMMS2R, complete genome</a>                             | 381       | 381         | 100%        | 3e-102  | 99%   | <a href="#">CP011306.1</a>     |
| <a href="#">PREDICTED: Pantolops hodgsonii electron transfer flavoprotein subunit beta, mitochondria</a> | 370       | 370         | 100%        | 7e-99   | 98%   | <a href="#">XM_005963657.1</a> |
| <a href="#">Stenotrophomonas maltophilia JV3, complete genome</a>                                        | 370       | 370         | 100%        | 7e-99   | 98%   | <a href="#">CP002986.1</a>     |
| <a href="#">Stenotrophomonas maltophilia K279a complete genome, strain K279a</a>                         | 364       | 364         | 100%        | 3e-97   | 97%   | <a href="#">AM743169.1</a>     |
| <a href="#">Stenotrophomonas maltophilia strain ISMMS3, complete genome</a>                              | 353       | 353         | 100%        | 7e-94   | 96%   | <a href="#">CP011010.1</a>     |
| <a href="#">Stenotrophomonas maltophilia strain 13637 genome</a>                                         | 353       | 353         | 100%        | 7e-94   | 96%   | <a href="#">CP008838.1</a>     |

### Stenotrophomonas maltophilia D457 complete genome

Sequence ID: [emb|HE798556.1|](#) Length: 4769156 Number of Matches: 1

Range 1: 621185 to 621399 [GenBank](#) [Graphics](#)

▼ Next Match ▲ Previous Match

| Score         | Expect                                                       | Identities    | Gaps      | Strand     |
|---------------|--------------------------------------------------------------|---------------|-----------|------------|
| 398 bits(215) | 3e-107                                                       | 215/215(100%) | 0/215(0%) | Plus/Minus |
| Query 1       | CCTGGAACGCTGGAAGTCGATCTGCCGGCCGTGGTCACCAACGACCTGCGCCTGAACGA  | 60            |           |            |
| Sbjct 621399  | CCTGGAACGCTGGAAGTCGATCTGCCGGCCGTGGTCACCAACGACCTGCGCCTGAACGA  | 621340        |           |            |
| Query 61      | GCCGCGCTTCATCAAGCTGCCGGACATCATGAAGGCCAAGGCCAAGCCGCTGGAGACCCT | 120           |           |            |
| Sbjct 621339  | GCCGCGCTTCATCAAGCTGCCGGACATCATGAAGGCCAAGGCCAAGCCGCTGGAGACCCT | 621280        |           |            |
| Query 121     | GCAGCTGGCCGACCTCGGCGTTGAAGCCGCCGACACCTTCAAGACCACCCAGTACGCCGC | 180           |           |            |
| Sbjct 621279  | GCAGCTGGCCGACCTCGGCGTTGAAGCCGCCGACACCTTCAAGACCACCCAGTACGCCGC | 621220        |           |            |
| Query 181     | GCCGTCCAAGCGCAGCAAGGGTGTGATGGTCAAGG                          | 215           |           |            |
| Sbjct 621219  | GCCGTCCAAGCGCAGCAAGGGTGTGATGGTCAAGG                          | 621185        |           |            |

## Stenotrophomonas maltophilia D457 complete genome

GenBank: HE798556.1

### FEATURES

source

Location/Qualifiers

1..215

**/organism="Stenotrophomonas maltophilia D457"**

/mol\_type="genomic DNA"

/strain="D457"

/db\_xref="taxon:[1163399](#)"

/country="Spain:Mostoles"

gene

complement(<1..>215)

/gene="etfB"

/locus\_tag="SMD\_0543"

CDS

complement(<1..>215)

/gene="etfB"

/locus\_tag="SMD\_0543"

/codon\_start=1

/transl\_table=[11](#)

**/product="Electron transfer flavoprotein, beta subunit"**

## Ferric siderophore transport system, periplasmic binding protein (TonB)

| Description                                                                      | Max score | Total score | Query cover | E value | Ident | Accession                  |
|----------------------------------------------------------------------------------|-----------|-------------|-------------|---------|-------|----------------------------|
| <a href="#">Stenotrophomonas maltophilia D457 complete genome</a>                | 564       | 564         | 100%        | 4e-157  | 99%   | <a href="#">HE798556.1</a> |
| <a href="#">Stenotrophomonas maltophilia strain 13637 genome</a>                 | 525       | 525         | 100%        | 2e-145  | 97%   | <a href="#">CP008838.1</a> |
| <a href="#">Stenotrophomonas maltophilia K279a complete genome, strain K279a</a> | 525       | 525         | 100%        | 2e-145  | 97%   | <a href="#">AM743169.1</a> |
| <a href="#">Stenotrophomonas maltophilia JV3, complete genome</a>                | 514       | 514         | 100%        | 4e-142  | 96%   | <a href="#">CP002986.1</a> |
| <a href="#">Stenotrophomonas maltophilia strain ISMMS2, complete genome</a>      | 475       | 475         | 100%        | 2e-130  | 94%   | <a href="#">CP011305.1</a> |
| <a href="#">Stenotrophomonas maltophilia strain ISMMS2R, complete genome</a>     | 475       | 475         | 100%        | 2e-130  | 94%   | <a href="#">CP011306.1</a> |
| <a href="#">Stenotrophomonas maltophilia strain ISMMS3, complete genome</a>      | 464       | 464         | 100%        | 5e-127  | 93%   | <a href="#">CP011010.1</a> |
| <a href="#">Stenotrophomonas maltophilia R551-3, complete genome</a>             | 453       | 453         | 99%         | 1e-123  | 93%   | <a href="#">CP001111.1</a> |

### Stenotrophomonas maltophilia D457 complete genome

Sequence ID: [emb|HE798556.1](#) Length: 4769156 Number of Matches: 1

Range 1: 4553337 to 4553650 [GenBank](#) [Graphics](#)

▼ Next Match ▲ Previous Match

| Score         | Expect                                                        | Identities                                          | Gaps      | Strand    |
|---------------|---------------------------------------------------------------|-----------------------------------------------------|-----------|-----------|
| 564 bits(305) | 4e-157                                                        | 311/314(99%)                                        | 0/314(0%) | Plus/Plus |
| Query 1       | CGCGAGAACC                                                    | CGCATGTATGCGCCGGCCGGCGACAACGCCATCGAGTACTACCTCGCCCTG | 60        |           |
| Sbjct 4553337 | CGCGAGAACC                                                    | CGCATGTACGCGCCGGCCGGCGACAACGCCATCGAGTACTACCTCGCCCTG | 4553396   |           |
| Query 61      | CGCGACAAGACCCCGGACGACGCTCGGTGAAGAGCGCGCTGACCGACCTGCTGCCGTAC   | 120                                                 |           |           |
| Sbjct 4553397 | CGCGACAAGACCCCGGACGACGCTCGGTGAAGAGCGCGCTGACCGACCTGCTGCCGTAC   | 4553456                                             |           |           |
| Query 121     | ACCCTGATCGCCGCCGAGCAGCACCTGGGGCGCGAGGACTACACCGAAGCGCAGCGACTG  | 180                                                 |           |           |
| Sbjct 4553457 | ACCCTGATCGCCGCCGAGCAGCACCTGGGGCGCGAGGACTACACCGAAGCGCAGCGGCTG  | 4553516                                             |           |           |
| Query 181     | GTGGCACTGATCGAGAAGGTGGATGTCATCCGCGCCGGCCCTGCCGCGCCTGAAGGACGGC | 240                                                 |           |           |
| Sbjct 4553517 | GTGGCGCTGATCGAGAAGGTGGATGTCATCCGCGCCGGCCCTGCCGCGCCTGAAGGACGGC | 4553576                                             |           |           |
| Query 241     | CTGGCCAAGGGCGTGCGAAGCGCGGCCAAGCGCACCGAGGCCGAAGCCGAGAAGGCCAAG  | 300                                                 |           |           |
| Sbjct 4553577 | CTGGCCAAGGGCGTGCGAAGCGCGGCCAAGCGCACCGAGGCCGAAGCCGAGAAGGCCAAG  | 4553636                                             |           |           |
| Query 301     | AAGGACGCCGAGGA                                                | 314                                                 |           |           |
| Sbjct 4553637 | AAGGACGCCGAGGA                                                | 4553650                                             |           |           |

## Stenotrophomonas maltophilia D457 complete genome

GenBank: HE798556.1

### FEATURES

source

### Location/Qualifiers

1..314

/organism="Stenotrophomonas maltophilia D457"

/mol\_type="genomic DNA"

/strain="D457"

/db\_xref="taxon:1163399"

/country="Spain:Mostoles"

gene

<1..>314

/locus\_tag="SMD\_4053"

CDS

<1..>314

/locus\_tag="SMD\_4053"

/codon\_start=1

/transl\_table=11

/product="Ferric siderophore transport system, periplasmic binding protein TonB"



## Ferric siderophore transport system, biopolymer transport protein (ExbB)

| Description                                                                      | Max score | Total score | Query cover | E value | Ident | Accession                  |
|----------------------------------------------------------------------------------|-----------|-------------|-------------|---------|-------|----------------------------|
| <a href="#">Stenotrophomonas maltophilia K279a complete genome, strain K279a</a> | 459       | 459         | 100%        | 2e-125  | 99%   | <a href="#">AM743169.1</a> |
| <a href="#">Stenotrophomonas maltophilia strain 13637 genome</a>                 | 453       | 453         | 100%        | 8e-124  | 99%   | <a href="#">CP008838.1</a> |
| <a href="#">Stenotrophomonas maltophilia strain ISMMS2, complete genome</a>      | 420       | 420         | 100%        | 8e-114  | 97%   | <a href="#">CP011305.1</a> |
| <a href="#">Stenotrophomonas maltophilia strain ISMMS2R, complete genome</a>     | 420       | 420         | 100%        | 8e-114  | 97%   | <a href="#">CP011306.1</a> |
| <a href="#">Stenotrophomonas maltophilia JV3, complete genome</a>                | 375       | 375         | 100%        | 2e-100  | 94%   | <a href="#">CP002986.1</a> |
| <a href="#">Stenotrophomonas maltophilia strain ISMMS3, complete genome</a>      | 370       | 370         | 100%        | 8e-99   | 93%   | <a href="#">CP011010.1</a> |
| <a href="#">Stenotrophomonas maltophilia D457 complete genome</a>                | 364       | 364         | 100%        | 4e-97   | 93%   | <a href="#">HE798556.1</a> |
| <a href="#">Stenotrophomonas maltophilia R551-3, complete genome</a>             | 353       | 353         | 100%        | 8e-94   | 92%   | <a href="#">CP001111.1</a> |

### Stenotrophomonas maltophilia K279a complete genome, strain K279a

Sequence ID: [emb|AM743169.1](#) Length: 4851126 Number of Matches: 1

Range 1: 1703311 to 1703561 [GenBank](#) [Graphics](#)

▼ Next Match ▲ Previous Match

| Score         | Expect                                                       | Identities   | Gaps      | Strand    |
|---------------|--------------------------------------------------------------|--------------|-----------|-----------|
| 459 bits(248) | 2e-125                                                       | 250/251(99%) | 0/251(0%) | Plus/Plus |
| Query 1       | GAGCGTTTCTGGTCCCTTCGGCGGACTGAAGTGCTGCCGCCCGGCCTCGGCCAGGAAGTG | 60           |           |           |
| Sbjct 1703311 | GAGCGTTTCTGGTCCCTTCGGCGGACTGAAGTGCTGCCGCCCGGCCTCGGCCAGGAAGTG | 1703370      |           |           |
| Query 61      | CGCAACTGGGCCGCCCGCGGCAAGCTCGACCCGGCCACCTGCAGACCTGCGGGCGAAC   | 120          |           |           |
| Sbjct 1703371 | CGCAACTGGGCCGCCCGCGGCAAGCTCGACCCGGCCACCTGCAGACCTGCGGGCGAAC   | 1703430      |           |           |
| Query 121     | TCGCCGCTGGGCGCGCTGCTGGCTGCCGCACTGGAAGCCCGCAACCGCCGCGACCAAG   | 180          |           |           |
| Sbjct 1703431 | TCGCCGCTGGGCGCGCTGCTGGCTGCCGCACTGGAAGCCCGCAACCGCCGCGACCAAG   | 1703490      |           |           |
| Query 181     | ATCCGCGAGCGCATCGAAGACACCGCCGCCACCTGGTGCACCGCATGGAGCGATTCTCTG | 240          |           |           |
| Sbjct 1703491 | ATCCGCGAGCGCATCGAAGACACCGCCGCCACCTGGTGCACCGCATGGAGCGATTCTCTG | 1703550      |           |           |
| Query 241     | AACGCACTGGG                                                  | 251          |           |           |
| Sbjct 1703551 | AACGCACTGGG                                                  | 1703561      |           |           |

### Stenotrophomonas maltophilia K279a complete genome, strain K279a

GenBank: AM743169.1

#### FEATURES

source

#### Location/Qualifiers

1..251

[/organism="Stenotrophomonas maltophilia K279a"](#)

[/mol\\_type="genomic DNA"](#)

[/strain="K279a"](#)

[/db\\_xref="taxon:522373"](#)

[/country="United Kingdom"](#)

gene

<1..>251

[/locus\\_tag="Smlt1638"](#)

CDS

<1..>251

[/locus\\_tag="Smlt1638"](#)

[/codon\\_start=1](#)

[/transl\\_table=11](#)

[/product="putative biopolymer transport protein"](#)

## Hemin transport protein (Htp)

| Description                                                                      | Max score | Total score | Query cover | E value | Ident | Accession                  |
|----------------------------------------------------------------------------------|-----------|-------------|-------------|---------|-------|----------------------------|
| <a href="#">Stenotrophomonas maltophilia K279a complete genome, strain K279a</a> | 427       | 427         | 100%        | 4e-116  | 99%   | <a href="#">AM743169.1</a> |
| <a href="#">Stenotrophomonas maltophilia strain 13637 genome</a>                 | 394       | 394         | 100%        | 4e-106  | 97%   | <a href="#">CP008838.1</a> |
| <a href="#">Stenotrophomonas maltophilia R551-3, complete genome</a>             | 366       | 366         | 98%         | 9e-98   | 95%   | <a href="#">CP001111.1</a> |
| <a href="#">Stenotrophomonas maltophilia strain ISMMS2, complete genome</a>      | 361       | 361         | 100%        | 4e-96   | 94%   | <a href="#">CP011305.1</a> |
| <a href="#">Stenotrophomonas maltophilia strain ISMMS2R, complete genome</a>     | 361       | 361         | 100%        | 4e-96   | 94%   | <a href="#">CP011306.1</a> |
| <a href="#">Stenotrophomonas maltophilia strain ISMMS3, complete genome</a>      | 350       | 350         | 100%        | 1e-92   | 94%   | <a href="#">CP011010.1</a> |
| <a href="#">Stenotrophomonas maltophilia D457 complete genome</a>                | 342       | 342         | 99%         | 2e-90   | 93%   | <a href="#">HE798556.1</a> |
| <a href="#">Stenotrophomonas maltophilia JV3, complete genome</a>                | 322       | 322         | 100%        | 2e-84   | 91%   | <a href="#">CP002986.1</a> |

### Stenotrophomonas maltophilia strain ISMMS2, complete genome

Sequence ID: [gb|CP011305.1](#) Length: 4509724 Number of Matches: 1

Range 1: 735723 to 735957 [GenBank](#) [Graphics](#)

▼ Next Match ▲ Previous Match

| Score         | Expect                                                       | Identities   | Gaps      | Strand    |
|---------------|--------------------------------------------------------------|--------------|-----------|-----------|
| 361 bits(195) | 4e-96                                                        | 222/235(94%) | 1/235(0%) | Plus/Plus |
| Query 1       | CACCGTGTGTGCTGTACACGCGGCAACGAGCTGGGCGGCTGGCGCCAGGCCGT        | 60           |           |           |
| Sbjct 735723  | CACCGTGTGTGCTGTACACGCGGCAACGAGCTGGGTGGCTGGCGCCAGGCCGT        | 735782       |           |           |
| Query 61      | ACGCGTACACGCTGCCAGGGCGTGGACAGCGAGGGCCTGCGCGAAAGCCTGTGCTTCCT  | 120          |           |           |
| Sbjct 735783  | ACGCGTGCACGCTGCCAGGGCGTGGACAGTGAAGGCCTGCGCGAGAGCCTGTGTTTCCT  | 735842       |           |           |
| Query 121     | TGATGGCCGCGGCGCGTGCCTGTGGCGCTGTACCTGCTGCCCGACAGCGATTTCTTGGC  | 180          |           |           |
| Sbjct 735843  | CGATGGCCGCGGCGCGTGCCTGTGGCGTTTGTACCTGCTGCCCGACAGCGACTTCTTGGC | 735902       |           |           |
| Query 181     | CTGGGACCGCTCTGGTCGCGGCGCTGCCGCGGGACCGGAACACGATAGCGA-GGC      | 234          |           |           |
| Sbjct 735903  | CTGGGACCGCCTGGTCGCGGCGCTGCCGCGGGACCGGAACACGACAGCGATGGC       | 735957       |           |           |

### Stenotrophomonas maltophilia strain ISMMS2, complete genome

GenBank: CP011305.1

| FEATURES | Location/Qualifiers                                                                                                                                                                                                                                                                                                                                                                                                |
|----------|--------------------------------------------------------------------------------------------------------------------------------------------------------------------------------------------------------------------------------------------------------------------------------------------------------------------------------------------------------------------------------------------------------------------|
| source   | 1..235<br><div>/organism="Stenotrophomonas maltophilia"</div> <div>/mol_type="genomic DNA"</div> <div>/strain="ISMMS2"</div> <div>/isolation_source="blood"</div> <div>/host="Homo sapiens"</div> <div>/db_xref="taxon:40324"</div> <div>/country="USA: New York, NY"</div> <div>/lat_lon="40.7898553 N 73.9531696 W"</div> <div>/collection_date="2013"</div> <div>/collected_by="The Mount Sinai Hospital"</div> |
| gene     | <1..>235<br><div>/locus_tag="YH67_03255"</div>                                                                                                                                                                                                                                                                                                                                                                     |
| CDS      | <1..>235<br><div>/locus_tag="YH67_03255"</div> <div>/inference="EXISTENCE: similar to AA</div> <div>sequence:RefSeq:WP_019661101.1"</div> <div>/note="Derived by automated computational analysis using</div> <div>gene prediction method: Protein Homology."</div> <div>/codon_start=1</div> <div><div>/transl_table=11</div></div> <div>/product="Hemin transport protein"</div>                                 |



## TonB-dependent hemin, ferrichrome receptor (FCR)

| Description                                                                      | Max score | Total score | Query cover | E value | Ident | Accession                  |
|----------------------------------------------------------------------------------|-----------|-------------|-------------|---------|-------|----------------------------|
| <a href="#">Stenotrophomonas maltophilia K279a complete genome, strain K279a</a> | 691       | 691         | 100%        | 0.0     | 99%   | <a href="#">AM743169.1</a> |
| <a href="#">Stenotrophomonas maltophilia strain 13637 genome</a>                 | 686       | 686         | 100%        | 0.0     | 99%   | <a href="#">CP008838.1</a> |
| <a href="#">Stenotrophomonas maltophilia R551-3, complete genome</a>             | 647       | 647         | 100%        | 0.0     | 97%   | <a href="#">CP001111.1</a> |
| <a href="#">Stenotrophomonas maltophilia strain ISMMS2, complete genome</a>      | 636       | 636         | 100%        | 1e-178  | 97%   | <a href="#">CP011305.1</a> |
| <a href="#">Stenotrophomonas maltophilia strain ISMMS2R, complete genome</a>     | 636       | 636         | 100%        | 1e-178  | 97%   | <a href="#">CP011306.1</a> |
| <a href="#">Stenotrophomonas maltophilia JV3, complete genome</a>                | 233       | 233         | 54%         | 2e-57   | 87%   | <a href="#">CP002986.1</a> |
| <a href="#">Stenotrophomonas maltophilia D457 complete genome</a>                | 231       | 231         | 58%         | 6e-57   | 85%   | <a href="#">HE798556.1</a> |
| <a href="#">Stenotrophomonas maltophilia strain ISMMS3, complete genome</a>      | 161       | 161         | 28%         | 8e-36   | 94%   | <a href="#">CP011010.1</a> |

### Stenotrophomonas maltophilia strain 13637 genome

Sequence ID: [gb|CP008838.1](#) Length: 4989312 Number of Matches: 1

Range 1: 746379 to 746758 [GenBank](#) [Graphics](#)

▼ Next Match ▲ Previous Match

| Score         | Expect                                                         | Identities   | Gaps      | Strand    |
|---------------|----------------------------------------------------------------|--------------|-----------|-----------|
| 686 bits(371) | 0.0                                                            | 377/380(99%) | 0/380(0%) | Plus/Plus |
| Query 1       | CGGAAATGAAGGCCGGTATCGAGTTTGGCGAACTCAGCCCGGCGCTGAAGGGCTGGGCGC   | 60           |           |           |
| Sbjct 746379  | CGGAAATGAAGGCCGGCATCGAGTTCGGCGAACTCAGCCCGGCGCTGAAGGGCTGGGCGC   | 746438       |           |           |
| Query 61      | TGCGCAGTGCGTTGGCATGGTCGCGTGGTGACAACCGGACCGATGACGAACCGCTGGCCT   | 120          |           |           |
| Sbjct 746439  | TGCGCAGTGCGTTGGCATGGTCGCGTGGTGACAACCGGACCGATGACGAACCGCTGGCCT   | 746498       |           |           |
| Query 121     | CGGTCGATCCGCTGCGTGCGCACGCTGGGCTGATGTACGACACCGATACCTGGGGCGTCG   | 180          |           |           |
| Sbjct 746499  | CGGTCGATCCGCTGCGTGCGCACGCTGGGCTGATGTACGACACCGATACCTGGGGCGTCG   | 746558       |           |           |
| Query 181     | AACTGGCCGGTACCTTCGTGCAGCGCAAGAAGCGCCTGCCGCCGCTGCGGCGCAGACCA    | 240          |           |           |
| Sbjct 746559  | AACTGGCCGGTACCTTCGTGCAGCGCAAGAAGCGCCTGCCGCCGCTGCGGCGCAGACCA    | 746618       |           |           |
| Query 241     | ATCCGAACGCACCGGCGCCGTTCTGTCTACCAAGCCGGCCGGCTACGGCGTGCTGGACCTGA | 300          |           |           |
| Sbjct 746619  | ATCCGAACGCACCGGCGCCGTTCTGTCTACCAAGCCGGCCGGCTACGGCGTGCTGGACCTGA | 746678       |           |           |
| Query 301     | TGGCGCACTGGAACCTTCGCGCCGGGTGCCACCTTCAATGTCGGCGTGTTCAACCTGGCCG  | 360          |           |           |
| Sbjct 746679  | TGGCGCACTGGAACCTTCGCGCCGGGTGCCACCTTCAATGTCGGCGTGTTCAACCTGGCCG  | 746738       |           |           |
| Query 361     | ACAAGCGCTACATCGAATGG                                           | 380          |           |           |
| Sbjct 746739  | ACAAGCGTTACATCGAATGG                                           | 746758       |           |           |

## Stenotrophomonas maltophilia strain 13637 genome

GenBank: CP008838.1

| FEATURES | Location/Qualifiers                                                                                                                                                                                                                                                   |
|----------|-----------------------------------------------------------------------------------------------------------------------------------------------------------------------------------------------------------------------------------------------------------------------|
| source   | 1..380<br>/organism="Stenotrophomonas maltophilia"<br>/mol_type="genomic DNA"<br>/strain="13637"<br>/db_xref="taxon:40324"                                                                                                                                            |
| gene     | <1..>380<br>/locus_tag="DP16_685"                                                                                                                                                                                                                                     |
| CDS      | <1..>380<br>/locus_tag="DP16_685"<br>/note="tonB-hemlactrns: TonB-dependent hemoglobin/transferrin/lactoferrin receptor family protein"<br>/codon_start=1<br>/transl_table=11<br>/product="TonB-dependent hemoglobin/transferrin/lactoferrin receptor family protein" |

### Predicted dye-decolorizing peroxidase, encapsulated subgroup (DyP)

| Description                                                                      | Max score | Total score | Query cover | E value | Ident | Accession                  |
|----------------------------------------------------------------------------------|-----------|-------------|-------------|---------|-------|----------------------------|
| <a href="#">Stenotrophomonas maltophilia D457 complete genome</a>                | 405       | 405         | 100%        | 2e-109  | 95%   | <a href="#">HE798556.1</a> |
| <a href="#">Stenotrophomonas maltophilia K279a complete genome, strain K279a</a> | 405       | 405         | 100%        | 2e-109  | 95%   | <a href="#">AM743169.1</a> |
| <a href="#">Stenotrophomonas maltophilia strain 13637 genome</a>                 | 394       | 394         | 100%        | 5e-106  | 94%   | <a href="#">CP008838.1</a> |
| <a href="#">Stenotrophomonas maltophilia JV3, complete genome</a>                | 387       | 387         | 98%         | 8e-104  | 94%   | <a href="#">CP002986.1</a> |
| <a href="#">Stenotrophomonas maltophilia strain ISMMS2, complete genome</a>      | 383       | 383         | 100%        | 1e-102  | 93%   | <a href="#">CP011305.1</a> |
| <a href="#">Stenotrophomonas maltophilia strain ISMMS2R, complete genome</a>     | 383       | 383         | 100%        | 1e-102  | 93%   | <a href="#">CP011306.1</a> |
| <a href="#">Stenotrophomonas maltophilia R551-3, complete genome</a>             | 383       | 383         | 100%        | 1e-102  | 93%   | <a href="#">CP001111.1</a> |
| <a href="#">Stenotrophomonas maltophilia strain ISMMS3, complete genome</a>      | 355       | 355         | 100%        | 2e-94   | 91%   | <a href="#">CP011010.1</a> |

Stenotrophomonas maltophilia K279a complete genome, strain K279a

Sequence ID: [emb|AM743169.1](#) Length: 485126 Number of Matches: 1

Range 1: 195850 to 196107 [GenBank](#) [Graphics](#)

▼ Next Match ▲ Previous Match

| Score         | Expect | Identities                                                   | Gaps      | Strand    |
|---------------|--------|--------------------------------------------------------------|-----------|-----------|
| 405 bits(219) | 2e-109 | 245/258(95%)                                                 | 0/258(0%) | Plus/Plus |
| Query 1       |        | GTGCTGAAGGTGAAGGATGACGAGGCGTCGATCGCCAGGGCACGCGAGGTGCTGGCGAGC |           | 60        |
| Sbjct 195850  |        | GTGCTGAAGGTGAAGGATGACGAGGCGTCGATCGCCAAGGCACGCGAGGTGCTGGCCAGC |           | 195909    |
| Query 61      |        | ACCGATGACCTGATCAAGAACACCGCCATCCGCGAGATCGAGCGTACCTTCACCTGCAAC |           | 120       |
| Sbjct 195910  |        | ACCGACGACCTGATCAAGAACACCGCCATCCGCGAGATCGAACGCACCTTCACCTGCAAC |           | 195969    |
| Query 121     |        | GTGGCCATCGGCCACCGCGTGTGGCAGCCGCTGGTGGGCTCCACGCCGCCGCGCGAGCTG |           | 180       |
| Sbjct 195970  |        | GTGGCCATCGGCCACCGCGTGTGGCAGCCGCTGGTGGGCACCACGCCGCCGCGCGAGTTG |           | 196029    |
| Query 181     |        | AAGCCGTTCCGTGAGATCAAGGGCGCCACCCACACCGCCGTGTCCACGCCCGGTGACCTG |           | 240       |
| Sbjct 196030  |        | CAGCCGTTCCGCGAGATCAAGGGCGCGACCCACACGCCGTGTCCACGCCGGGCGACCTG  |           | 196089    |
| Query 241     |        | CTGTACCACATCCGTGCA                                           | 258       |           |
| Sbjct 196090  |        | CTGTACCACATCCGTGCA                                           | 196107    |           |

**Stenotrophomonas maltophilia K279a complete genome, strain K279a**

GenBank: AM743169.1

```

FEATURES
    source
        1..258
            /organism="Stenotrophomonas maltophilia K279a"
            /mol_type="genomic DNA"
            /strain="K279a"
            /db_xref="taxon:522373"
            /country="United Kingdom"
    gene
        <1..>258
            /locus_tag="Smlt0187"
    CDS
        <1..>258
            /locus_tag="Smlt0187"
            /note="similarity:fasta; with=UniProt:Q2UBB0
            (EMBL:AP007162); Aspergillus oryzae.; Predicted
            iron-dependent peroxidase.; length=315; id 62.215%;
            ungapped id 62.215%; E()=1e-70; 307 aa overlap; query
            18-324; subject 8-314"
            /codon_start=1
            /transl_table=11
            /product="putative peroxidase"

```



## Ferric uptake regulation protein FUR (Fur)

| Description                                                                      | Max score | Total score | Query cover | E value | Ident | Accession                  |
|----------------------------------------------------------------------------------|-----------|-------------|-------------|---------|-------|----------------------------|
| <a href="#">Stenotrophomonas maltophilia JV3, complete genome</a>                | 449       | 449         | 100%        | 1e-122  | 96%   | <a href="#">CP002986.1</a> |
| <a href="#">Stenotrophomonas maltophilia K279a complete genome, strain K279a</a> | 449       | 449         | 100%        | 1e-122  | 96%   | <a href="#">AM743169.1</a> |
| <a href="#">Stenotrophomonas maltophilia strain 13637 genome</a>                 | 438       | 438         | 100%        | 2e-119  | 95%   | <a href="#">CP008838.1</a> |
| <a href="#">Stenotrophomonas maltophilia R551-3, complete genome</a>             | 427       | 427         | 100%        | 5e-116  | 94%   | <a href="#">CP001111.1</a> |
| <a href="#">Stenotrophomonas maltophilia strain ISMMS3, complete genome</a>      | 416       | 416         | 100%        | 1e-112  | 94%   | <a href="#">CP011010.1</a> |
| <a href="#">Stenotrophomonas maltophilia strain ISMMS2, complete genome</a>      | 411       | 411         | 100%        | 5e-111  | 93%   | <a href="#">CP011305.1</a> |
| <a href="#">Stenotrophomonas maltophilia strain ISMMS2R, complete genome</a>     | 411       | 411         | 100%        | 5e-111  | 93%   | <a href="#">CP011306.1</a> |
| <a href="#">Stenotrophomonas rhizophila strain DSM14405 genome</a>               | 405       | 405         | 100%        | 2e-109  | 93%   | <a href="#">CP007597.1</a> |
| <a href="#">Stenotrophomonas maltophilia D457 complete genome</a>                | 388       | 388         | 100%        | 2e-104  | 92%   | <a href="#">HE798556.1</a> |

### Stenotrophomonas maltophilia JV3, complete genome

Sequence ID: [gb|CP002986.1](#) Length: 4544477 Number of Matches: 1

Range 1: 1789191 to 1789469 [GenBank](#) [Graphics](#)

▼ Next Match ▲ Previous Match

| Score         | Expect                                                        | Identities   | Gaps      | Strand    |
|---------------|---------------------------------------------------------------|--------------|-----------|-----------|
| 449 bits(243) | 1e-122                                                        | 268/280(96%) | 2/280(0%) | Plus/Plus |
| Query 1       | TGACCGCCGAAGACATCTACCGCCAGCTGCTGGAGCACGGCGACGAGATCGGCCTGGCCA  | 60           |           |           |
| Sbjct 1789191 | TGACCGCCGAAGACATCTACCGCCAGCTGCTGGAGCACGGCGACGAGATCGGCCTGGCCA  | 1789250      |           |           |
| Query 61      | CGGTGTACCGGGTGTGACCCAGTTTCGAGGCCGCGGCCCTCGTGCTCAAGCACAATTTTCG | 120          |           |           |
| Sbjct 1789251 | CGGTGTACCGGGTGTGACCCAGTTTCGAGGCCGCGGCCCTCGTGCTCAAGCACAATTTTCG | 1789310      |           |           |
| Query 121     | AGGGCGGCCAGGCGGTCTACGAACTGGACCGTGGCGGCCACCACGACCACATGGTCGACG  | 180          |           |           |
| Sbjct 1789311 | AAGGCGGCCAGGCGGTCTACGAGCTGGACCGTGGCGGCCACCACGACCACATGGTCGACG  | 1789370      |           |           |
| Query 181     | TGGACAGTGGCAAGATCATCGAGTTTCGAAAGCCACGAGATCGAGGAGCTGCAGCGCA-GA | 239          |           |           |
| Sbjct 1789371 | TGGACAGCGGCAAGATCATCGAGTTTCGAAAGCCACGAGATCGAGGAGCTGCAGCGCAAGA | 1789430      |           |           |
| Query 240     | TTCCGCGCAGACCATGGCTACGAACTGGAAGAGCACTCGC                      | 279          |           |           |
| Sbjct 1789431 | -TCGCGGCCGACCACGGCTACGAGCTGGAAGAGCATTCGC                      | 1789469      |           |           |

## Stenotrophomonas maltophilia JV3, complete genome

GenBank: CP002986.1

| FEATURES | Location/Qualifiers                                     |
|----------|---------------------------------------------------------|
| source   | 1..279                                                  |
|          | /organism="Stenotrophomonas maltophilia JV3"            |
|          | /mol_type="genomic DNA"                                 |
|          | /strain="JV3"                                           |
|          | /db_xref="taxon:868597"                                 |
|          | /country="Brazil"                                       |
|          | /note="isolated from plants"                            |
| gene     | <1..>279                                                |
|          | /locus_tag="BurJV3_1637"                                |
| CDS      | <1..>279                                                |
|          | /locus_tag="BurJV3_1637"                                |
|          | /inference="protein motif:PFAM:PF01475"                 |
|          | /note="PFAM: Ferric-uptake regulator;                   |
|          | KEGG: smt:Smal_1594 Fur family ferric uptake regulator" |
|          | /codon_start=1                                          |
|          | /transl_table=11                                        |
|          | /product="ferric uptake regulator, Fur family"          |
