# Supplementary material for: Putative Iron Acquisition Systems in Stenotrophomonas maltophilia
Source: MDPI journal article supplement (doi:10.3390/molecules23082048), 2018-08-16
Supplement: s1 [file s1]

**Supplementary Table S5: nCounter Elements design details for iron acquisition gene expression in *S. maltophilia*.**

| <b>Targets</b>                                                      | <b>Abbrev.</b> | <b>GenBank<br/>accession number</b> | <b>Target's<br/>position</b> | <b>Probe A<br/>T<sub>m</sub> ( °C)</b> | <b>Probe B<br/>T<sub>m</sub> ( °C)</b> |
|---------------------------------------------------------------------|----------------|-------------------------------------|------------------------------|----------------------------------------|----------------------------------------|
| <b>Iron siderophore sensor &amp; receptor system</b>                |                |                                     |                              |                                        |                                        |
| Sigma factor ECF subfamily                                          | FeSreg         | SMLT_RS18585                        | 196 – 295                    | 90                                     | 89                                     |
| Iron siderophore receptor protein                                   | FeSR           | SMLT_RS12940                        | 1484 – 1583                  | 89                                     | 89                                     |
| Iron siderophore sensor protein                                     | FeSS           | SMLT_RS18580                        | 120 – 219                    | 92                                     | 92                                     |
| <b>Heme, hemin uptake and utilization systems in Gram-positives</b> |                |                                     |                              |                                        |                                        |
| Heme oxygenase, associated with heme uptake                         | HemO/HO        | SMLT_RS18565                        | 318 – 417                    | 90                                     | 86                                     |
| Heme ABC transporter, ATPase component                              | HmuV           | SMLT_RS11325                        | 229 – 328                    | 87                                     | 89                                     |
| Hypothetical protein related to heme utilization                    | Hyp1           | SMLT_RS19415                        | 115 – 214                    | 84                                     | 90                                     |
| Heme ABC transporter, permease protein                              | HmuU           | SMLT_RS11320                        | 556 – 655                    | 88                                     | 88                                     |
| Heme ABC transporter, cell surface heme and hemoprotein receptor    | HmuT           | SMLT_RS11315                        | 602 – 701                    | 89                                     | 89                                     |

|                                                                                      |      |              |             |    |    |
|--------------------------------------------------------------------------------------|------|--------------|-------------|----|----|
| <b>Heme, hemin uptake and utilization systems in Gram-negatives</b>                  |      |              |             |    |    |
| Outer membrane receptor proteins, mostly Fe transport                                | Rp2  | SMLT_RS13970 | 1138 – 1237 | 87 | 86 |
| Hemin uptake protein                                                                 | Hup  | SMD_0678     | 36 – 135    | 87 | 89 |
| Electron transfer flavoprotein, beta subunit                                         | ETFb | SMLT_RS03075 | 316 – 415   | 89 | 88 |
| Ferric siderophore transport system, periplasmic binding protein                     | TonB | SMLT_RS21345 | 781 – 880   | 89 | 89 |
| Ferric siderophore transport system, biopolymer transport protein                    | ExbB | SMLT_RS07890 | 483 – 582   | 84 | 89 |
| Hemin transport protein                                                              | Htp  | SMD_0680     | 147 – 246   | 89 | 89 |
| TonB-dependent hemin, ferrichrome receptor                                           | FCR  | SMLT_RS03785 | 848 – 947   | 89 | 89 |
| <b>Encapsulating protein DyP-type peroxidase and ferritin-like protein oligomers</b> |      |              |             |    |    |
| Predicted dye-decolorizing peroxidase, encapsulated subgroup                         | DyP  | SMLT_RS00875 | 346 – 445   | 86 | 88 |
| <b>Oxidative stress related to iron uptake</b>                                       |      |              |             |    |    |
| Ferric uptake regulation protein FUR                                                 | Fur  | SMLT_RS09600 | 206 – 305   | 89 | 87 |

**Abbrev.:** Abbreviation; **T<sub>m</sub>:** melting temperature
