# Supplementary material for: Putative Iron Acquisition Systems in Stenotrophomonas maltophilia
Source: MDPI journal article supplement (doi:10.3390/molecules23082048), 2018-08-16
Supplement: s1 [file s1]

**Supplementary Table S3: Fold changes in expression under iron-depleted and iron-repleted conditions screened through nCounter Elements for clinical and environmental isolates**

| Targets<br>(Abbrev.) | Clinical isolates<br>(n=3) |                            |              |                      | Environmental isolates<br>(n=3) |                            |              |                      |
|----------------------|----------------------------|----------------------------|--------------|----------------------|---------------------------------|----------------------------|--------------|----------------------|
|                      | Iron-depleted <sup>a</sup> | Iron-repleted <sup>a</sup> | Fold changes | p-value <sup>b</sup> | Iron-depleted <sup>a</sup>      | Iron-repleted <sup>a</sup> | Fold changes | p-value <sup>b</sup> |
| FeSreg               | 4.61                       | 1.92                       | 2.40         | 0.0904               | 1.67                            | 2.03                       | -1.22        | 0.6532               |
| FeSR                 | 23.59                      | 3.84                       | 6.15         | <b>0.0234</b>        | 2.94                            | 1.65                       | 1.78         | 0.5680               |
| FeSS                 | 3.34                       | 4.53                       | -1.36        | 0.6867               | 3.01                            | 2.85                       | 1.05         | 0.9343               |
| HemO/HO              | 7.34                       | 2.20                       | 3.34         | 0.0987               | 2.25                            | 1.50                       | 1.50         | 0.4827               |
| HmuV                 | 2.42                       | 1.03                       | 2.34         | 0.2708               | 1.08                            | 1.31                       | -1.22        | 0.5415               |
| Hyp1                 | 3.93                       | 1.24                       | 3.16         | 0.1843               | 2.64                            | 1.67                       | 1.58         | 0.5320               |
| HmuU                 | 10.61                      | 1.30                       | 8.14         | 0.0540               | 2.30                            | 1.95                       | 1.18         | 0.7832               |
| HmuT                 | 18.60                      | 1.52                       | 12.21        | <b>0.0051</b>        | 1.36                            | 1.23                       | 1.10         | 0.7923               |
| Rp2                  | 4.88                       | 4.30                       | 1.14         | 0.8149               | 2.40                            | 2.81                       | -1.17        | 0.8189               |
| Hup                  | 65.38                      | 11.98                      | 5.46         | <b>0.0139</b>        | 14.64                           | 9.55                       | 1.53         | 0.6647               |
| ETFb                 | 10.02                      | 4.39                       | 2.28         | <b>0.0104</b>        | 6.74                            | 6.16                       | 1.09         | 0.8241               |

|      |       |      |      |               |      |      |       |        |
|------|-------|------|------|---------------|------|------|-------|--------|
| TonB | 2.10  | 1.03 | 2.03 | <b>0.0005</b> | 1.71 | 1.31 | 1.30  | 0.6810 |
| ExbB | 10.08 | 2.77 | 3.64 | 0.0702        | 6.82 | 4.06 | 1.68  | 0.2288 |
| Htp  | 1.33  | 1.03 | 1.28 | 0.3409        | 1.71 | 1.04 | 1.64  | 0.4518 |
| FCR  | 9.02  | 2.42 | 3.73 | 0.0856        | 2.25 | 1.95 | 1.15  | 0.8009 |
| DyP  | 14.73 | 6.28 | 2.35 | 0.2030        | 1.32 | 1.55 | -1.17 | 0.5626 |
| Fur  | 21.76 | 6.59 | 3.30 | <b>0.0027</b> | 3.84 | 1.87 | 2.06  | 0.3325 |

<sup>a</sup> Average counts of normalized grouped data.

<sup>b</sup> The distribution of the t-statistic is calculated using the Welch-Satterthwaite equation for the degrees of freedom and in the estimation of the 95% confidence limits for observed differential expression between groups.

The p-values in **bold** are consider statistically significant, set at (p<0.05)
