# Supplementary material for: Putative Iron Acquisition Systems in Stenotrophomonas maltophilia
Source: MDPI journal article supplement (doi:10.3390/molecules23082048), 2018-08-16
Supplement: s1 [file s1]

**Supplementary Table S4: Mean OD reading for *N. meningitidis*, SM77 and LM10879 under the iron-depleted and iron-repleted conditions**

| Iron sources           | Mean (SD)      | F statistics (df) <sup>a</sup> | p-value <sup>b</sup> |
|------------------------|----------------|--------------------------------|----------------------|
| <i>N. meningitidis</i> |                |                                |                      |
| Iron-depleted          | 0.792 (0.582)  | 24.360 (4)                     | <0.001               |
| Hemin                  | 1.399 (0.963)  |                                |                      |
| Hemoglobin             | 1.480 (0.873)  |                                |                      |
| Transferrin            | 1.653 (0.814)  |                                |                      |
| Lactoferrin            | 1.585 (1.019)  |                                |                      |
| <b>SM77</b>            |                |                                |                      |
| Iron-depleted          | 2.027 (1.054)  | 21.764 (4)                     | 0.034                |
| Hemin                  | 2.224 (1.129)  |                                |                      |
| Hemoglobin             | 2.606 (1.154)  |                                |                      |
| Transferrin            | 2.756 (1.191)  |                                |                      |
| Lactoferrin            | 2.272 (1.162)  |                                |                      |
| <b>LMG10879</b>        |                |                                |                      |
| Iron-depleted          | 1.346 (0.685 ) | 23.549 (4)                     | 0.012                |
| Hemin                  | 1.650 (0.840)  |                                |                      |
| Hemoglobin             | 2.281 (1.157)  |                                |                      |
| Transferrin            | 2.233 (1.142)  |                                |                      |
| Lactoferrin            | 1.733 (1.072)  |                                |                      |

<sup>a</sup> One Way RM ANOVA test

<sup>b</sup> Iron-depleted versus respective iron-repleted sources, post-hoc test (Duncan's Method)
